# Orthogonal Functions for Evaluating Social Distancing Impact on CoVID-19 Spread

Gengmun Eng

PhD Physics 1978, University of Illinois at Urbana-Champaign  
geng001@socal.rr.com

June 20, 2020

## Abstract

Early CoVID-19 growth often obeys:  $N\{\hat{t}\} \approx N_I \exp[+K_o \hat{t}]$ , with  $K_o = [(\ln 2)/(t_{dbl})]$ , where  $t_{dbl}$  is the pandemic *doubling time*, prior to society-wide *Social Distancing*. Previously, we modeled *Social Distancing* with  $t_{dbl}$  as a linear function of time, where  $N[t] \approx \mathbf{1} \exp[+K_A t / (1 + \gamma_o t)]$  is used here. Additional parameters besides  $\{K_o, \gamma_o\}$  are needed to better model different  $\rho[t] = dN[t]/dt$  shapes. Thus, a new *Orthogonal Function Model [OFM]* is developed here using these orthogonal function series:

$$N(Z) = \sum_{m=0}^{m=M_F} g_m L_m(Z) \exp[-Z],$$

$$R(Z) = \sum_{m=0}^{m=M_F} c_m L_m(Z) \exp[-Z],$$

where  $N(Z)$  and  $Z[t]$  form an implicit  $N[t] \equiv N(Z[t])$  function, giving:

$$G_o \equiv [K_A / \gamma_o], \quad Z[t] \equiv +[G_o / (1 + \gamma_o t)],$$

$$\rho[t] \equiv [\gamma_o / G_o] Z^2 R(Z),$$

with  $L_m(Z)$  being the *Laguerre Polynomials*. At large  $M_F$  values, nearly *arbitrary* functions for  $N[t]$  and  $\rho[t] = dN[t]/dt$  can be accommodated. How to determine  $\{K_A, \gamma_o\}$  and the  $\{g_m; m = (0, +M_F)\}$  constants from any given  $N(Z)$  dataset is derived, with  $\rho[t]$  set by:

$$c_{M_F-k} = \sum_{m=0}^{m=k} g_m.$$

The *bing.com* USA CoVID-19 data was analyzed using  $M_F = (0, 1, 2)$  in the *OFM*. All results agreed to within about 10 percent, showing model robustness. Averaging over all these predictions gives the following overall estimates for the number of USA CoVID-19 cases at the pandemic end:

$$\langle N_{\max} \rangle = 5,009,677 \pm 269,450 \quad (\text{data to } 5/3/20), \text{ and}$$

$$\langle N_{\max} \rangle = 4,422,803 \pm 162,580 \quad (\text{data to } 6/7/20),$$

which compares the pre- and post-early May *bing.com* revisions. The CoVID-19 pandemic in Italy was examined next. The  $M_F = 2$  limit was inadequate to model the Italy  $\rho[t]$  pandemic tail. Thus, regions with a quick CoVID-19 pandemic shutoff may have additional *Social Distancing* factors operating, beyond what can be easily modeled by just progressively lengthening pandemic *doubling times* (with *13 Figures*).

## 1 Introduction

The early stages of the CoVID-19 coronavirus pandemic around the world showed a nearly exponential rise in the number of infections with time. If a significant fraction of the population gets infected ("*saturated pandemic*"), exponential growth no longer applies. However, *Social Distancing* can also mitigate exponential growth, enabling pandemic shutoff with only a small fraction of the population being infected ("*dilute pandemic*"). Let  $N\{\hat{t}\}$  be the total number of CoVID-19 cases in any given region, with  $\rho\{\hat{t}\}$  being the predicted number of daily new CoVID-19 cases, so that:

$$N\{\hat{t}\} = \int_{t'=0}^{t'=\hat{t}} \rho\{t'\} dt'. \quad [1.1a]$$

$$\rho\{\hat{t}\} = dN\{\hat{t}\} / d\hat{t}, \quad [1.1b]$$

On 3/25/2020, the *Institute of Health Metrics and Evaluation, University of Washington* (IHME) released their initial model for CoVID-19 spread<sup>1</sup> where:

"The cumulative death rate for each location is assumed to follow a parametrized Gaussian error function."

Since the IHME  $\rho\{\hat{t}\}$  used Gaussians, their projections assumed that the rise to the pandemic peak and its subsequent fall would be symmetric. Their implicit assumption was that the amount of *Social Distancing* was exactly what was needed to make their model predictions true. Given a sharp  $\rho\{\hat{t}\}$  rise, our concern was that the IHME model did not allow  $\rho\{\hat{t}\}$  to decrease gradually.

As a result, we developed an alternative CoVID-19 spread model, which assumed<sup>2</sup> *Social Distancing* gradually lengthens the CoVID-19 *doubling time*. The initial exponential growth factor  $K_o = [(\ln 2)/t_{dbl}]$  was used as a starting point, where  $t_{dbl}$  was the initial *doubling time*. A new *Social Mitigation Parameter [SMP]*  $\alpha_S$  was introduced to account for society-wide *Social Distancing* measures. A linear function was used for *doubling time* lengthening as a simple extension beyond a constant  $K_o$ , giving:

$$N\{\hat{t}\} \approx N_I \exp[+K_o \hat{t} / (1 + \alpha_S \hat{t})], \quad [1.2a]$$

$$N\{\hat{t} \rightarrow \infty\} \approx N_I \exp[+K_o / \alpha_S] = N_{\max}^o, \quad [1.2b]$$

as an *Initial Model*<sup>2</sup> for the number of CoVID-19 cases, where  $\hat{t} = 0$  was the start of society-wide *Social Distancing*. Both  $N_I = N\{\hat{t} = 0\}$  and  $N_F = N\{\hat{t} = t_{end}^{data}\}$ , as the most recently available data, were treated as fixed points. A minimum *root-mean-square (rms)* error datafit, using a logarithmic Y-axis, sets the  $\{K_o, \alpha_S\}$  values. The resulting  $N\{\hat{t} \rightarrow \infty\}$  of Eq. [1.2b] is the predicted final number of CoVID-19 cases at the pandemic end.

On 4/29/2020, we sent our preprint<sup>2</sup> to the IHME, the Los Angeles Department of Public Health (LADPH), and to Profs. Goldenfeld and Maslov at UI (University of Illinois at Urbana-Champaign), who were preparing a 2-day nationwide CoVID-19 remote-learning seminar for 5/6/2020 and 5/8/2020.

Also, on 4/29/2020, the IHME electronically published their 12<sup>th</sup> CoVID-19 update, using their 3/25/2020 model. A graphic display of their most recent  $\rho\{\hat{t}\}$  projections showed a symmetric rise and fall. This graph was widely publicized by Dr. Alan Boyle, who was following the IHME work, summarizing it

for general audiences<sup>3-5</sup>. Since our Eqs. [1.2a]-[1.2b] model gave substantially different  $\rho\{\hat{t}\}$  predictions than IHME, we added a note to that effect in our pre-print, submitting the final pre-print to MedRxiv on 5/4/2020, where it was accepted and published on-line on 5/8/2020.

Concurrently, on 5/4/2020, IHME published their 13<sup>th</sup> CoVID-19 update<sup>6</sup>, where everything changed. Dr. Alan Boyle<sup>5</sup> summarized those changes with a note that: "[IHME] researchers acknowledged that their previous modeling wasn't sophisticated enough". Both IHME graphical predictions for 4/29/2020 and 5/4/2020 are shown in **Figure 1**, to highlight this change.

On 5/6/2020 and 5/8/2020, Profs. Goldenfeld and Maslov presented their UOI team's supercomputer-based  $\rho\{\hat{t}\}$  CoVID-19 projections, which also were very asymmetric. Although mathematical details for the UOI and new IHME projections are not known, virtually all  $\rho\{\hat{t}\}$  CoVID-19 projections are now asymmetric, as the developing CoVID-19 data also appears to be.

Since our *Initial Model* had only two data fitting parameters  $\{K_o, \alpha_S\}$ , we became concerned that those two parameters might not be sufficient to adequately describe all the different  $\rho\{\hat{t}\}$  shapes observed. To correct this potential defect, a new *Orthogonal Function Model [OFM]* is developed here to allow more accurate descriptions for a variety of  $\rho\{\hat{t}\}$  shapes, using additional mathematical techniques derived herein. This *OFM* extends Eqs. [1.2a]-[1.2b], and provides additional fitting parameters to improve  $\rho\{\hat{t}\}$  projections.

## 2 Orthogonal Function Model [OFM] Elements

The following items and methods were developed as part of this *OFM* to improve CoVID-19 projections for a variety of  $\rho\{\hat{t}\}$  data shapes.

**First**, the  $\hat{t} = 0$  point in Eq. [1.2a] was time-shifted so that  $N[t = 0] \equiv \mathbf{1}$ . This  $t = 0$  point now provides an estimate for the CoVID-19 pandemic starting point, replacing the above  $N\{\hat{t}\}$  with this time-shifted version:

$$N[t] \approx \mathbf{1} \exp[+K_A t / (1 + \gamma_o t)] = \exp[+G_o] \exp[-Z], \quad [2.1a]$$

$$G_o \equiv [K_A / \gamma_o], \quad [2.1b]$$

$$Z[t] \equiv +[G_o / (1 + \gamma_o t)], \quad [2.1c]$$

$$N[t \rightarrow \infty, Z \rightarrow 0] \approx \mathbf{1} \exp[+K_A / \gamma_o] = \exp[+G_o] = N_{\max}^o, \quad [2.1d]$$

$$\rho[t] = dN[t] / dt, \quad [2.1e]$$

$$N[t] = \int_{t'=0}^{t'=t} \rho[t'] dt', \quad [2.1f]$$

which enables Eq. [2.1a] to become a 1-term approximation for a larger function series. Actual data provides the  $\{N_I, N_F\}$  values. However, these  $\{t = t_I, N[t_I] \equiv N_I\}$  and  $\{t = t_F, N[t_F] \equiv N_F\}$  limits are now used to set  $\{K_A, G_o, \gamma_o\} > 0$ , so that the  $N_{\max}^o$  of Eq. [1.2b] and Eq. [2.1d] match exactly.

**Second**, when  $Z \rightarrow 0$  in Eq. [2.1c] then  $t \rightarrow \infty$ ; while  $Z \rightarrow +\infty$  corresponds to  $t \rightarrow (-1/\gamma_o) + \varepsilon$ , where  $\varepsilon$  is arbitrarily small and positive. Since  $N[t = 0] = \mathbf{1}$ , the  $t < 0$  domain has  $N[t] < 1$ , while setting a particular time as the  $N[t] = 0$  point. Since the  $\mathbf{1} > N[t] > 0$  regime has no impact on this overall analysis, virtually any decreasing function tail for the  $Z \rightarrow +\infty$  limit should be allowed.

**Third**, instead of generalizing Eq. [2.1a] using time, it is easier to use functions of  $Z$ , where  $Z$  is given by Eq. [2.1c]. It results in these  $N(Z)$  and  $R(Z)$  substitutes for  $N[t]$  and  $\rho[t]$ :

$$N(Z) \equiv \int_{Z'=Z}^{Z'+\infty} R(Z') dZ'. \quad [2.2]$$

Given explicit functions of  $Z$ , both  $N(Z)$  and  $R(Z)$  in Eq. [2.2] go from large- $Z$  to smaller- $Z$  values at longer times, eventually approaching the  $Z = 0$  point. Together,  $N(Z)$  and  $Z[t]$  create an implicit  $N(Z[t]) \equiv N[t]$  function, and  $R(Z)$  and  $Z[t]$  create another implicit  $R(Z[t]) \equiv R[t]$  function. A standard change of variables converts them back into being explicit functions of time:

$$N[t] \equiv \int_{\hat{z}=Z[t], t'=t}^{\hat{z}=+\infty, t'=(-1/\gamma_o)} R(Z[t']) \frac{dZ}{dt'} dt' = \int_{t'=t}^{t'=(-1/\gamma_o)} R(Z[t']) \left[ \frac{-G_o \gamma_o}{(1+\gamma_o t')^2} \right] dt' = \left( \frac{\gamma_o}{G_o} \right) \int_{t'=(-1/\gamma_o)}^{t'=t} (Z[t'])^2 R(Z[t']) dt'. \quad [2.3]$$

It gives these equivalences between and Eq. [2.2] and Eq. [2.1f]:

$$N[t] \equiv \int_{t'=(-1/\gamma_o)}^{t'=t} \rho[t'] dt', \quad [2.4a]$$

$$\rho[t] \equiv (\gamma_o / G_o) Z^2 R(Z), \quad [2.4b]$$

$$Z[t] \equiv +[G_o / (1 + \gamma_o t)]. \quad [2.4c]$$

**Fourth**, to allow additional data fitting parameters, the *OFM* replaces the 1-term approximation of Eq. [2.1a] with these orthogonal function series:

$$N(Z) = \sum_{m=0}^{m=M_F} g_m L_m(Z) \exp[-Z], \quad [2.5a]$$

$$R(Z) = \sum_{m=0}^{m=M_F} c_m L_m(Z) \exp[-Z]. \quad [2.5b]$$

These series have  $\exp[-Z]$  as their weighting function, while keeping the Eqs. [2.1b]-[2.1c] definitions for  $\{Z, G_o, \gamma_o\}$ . The  $\{g_m; m = (0, +M_F)\}$  and  $\{c_m; m = (0, +M_F)\}$  coefficients are constants that can be derived from each dataset. For a wide range of  $N(Z)$  and  $R(Z)$  functions, larger  $M_F$  values and more  $\{L_m(Z); m = (0, +M_F)\}$  terms give progressively better matches to practically any *arbitrary function*. This feature is what enables improved datafits over a variety of measured  $N[t]$  and  $\rho[t]$  curves.

**Fifth**, the *OFM* uses the  $\{N_I[t_I], N_F[t_F]\}$  data end-points to set  $\{G_o, \gamma_o\}$  in Eq. [2.4c], and define  $Z$ , allowing the *OFM* to provide best fits over the whole data range of  $Z$  or  $t$ , while these end points are fixed in the *Initial Model*.

The difference between: (a) using the whole data range for fitting, versus (b) using the data end points for fitting, is most evident when comparing Eq. [2.1a] to Eq. [2.5a]. In Eq. [2.1a],  $N[t] = G_o \exp[-Z]$  where  $G_o$  has a pre-set value, whereas in Eq. [2.5a],  $N(Z) = g_0 \exp[-Z]$  for  $M_F = 0$ , the  $g_0$  parameter is determined by fitting over the whole data range.

**Sixth**, both  $Z$  and  $t$  essentially span from  $\{0, +\infty\}$ . Using  $\exp[-Z]$  as a weighting function over that domain makes the choice of  $L_m(Z)$  in Eq. [2.5a]-[2.5b] unique. They are the *Laguerre Polynomials*, with the first few being:

$$L_{-1}(Z) \equiv 0, \quad [2.6a]$$

$$L_0(Z) \equiv 1 = L_m(Z = 0), \quad [2.6b]$$

$$L_1(Z) \equiv (1 - Z), \quad [2.6c]$$

$$L_2(Z) \equiv (1 - 2Z + \frac{1}{2}Z^2), \quad [2.6d]$$

$$L_3(Z) \equiv (1 - 3Z + \frac{3}{2}Z^2 - \frac{1}{6}Z^3), \quad [2.6e]$$

$$L_4(Z) \equiv (1 - 4Z + 3Z^2 - \frac{2}{3}Z^3 + \frac{1}{24}Z^4). \quad [2.6f]$$

Some important properties of the *Laguerre Polynomials* are:

$$\int_{Z=0}^{Z=+\infty} L_m(Z) L_n(Z) \exp(-Z) dZ = \mathbf{1} \delta_{m,n}, \quad [2.7a]$$

$$\delta_{m,n} = \begin{pmatrix} \mathbf{1} & \text{for } m=n \\ \mathbf{0} & \text{otherwise} \end{pmatrix}, \quad [2.7b]$$

$$\int_{Z'=Z}^{Z'=+\infty} L_m(Z') \exp(-Z') dZ' = [L_m(Z) - L_{m-1}(Z)] \exp(-Z), \quad [2.7c]$$

$$L_m(Z) \exp(-Z) = \frac{1}{m!} \frac{d^m}{dZ^m} [Z^m e^{-Z}] = e^{-Z} \sum_{k=0}^{k=m} (-1)^k \frac{m!}{k!(m-k)!} \left[ \frac{Z^k}{k!} \right], \quad [2.7d]$$

$$L_{m \geq 2}(Z) = [2 - \frac{(Z+1)}{m}] L_{m-1}(Z) - [1 - \frac{1}{m}] L_{m-2}(Z), \quad [2.7e]$$

where Eq. [2.7a] defines an *orthogonal function set*. Given  $\mathbf{n}$  is an integer in Eq. [2.7d],  *$\mathbf{n}$ -factorial* ( $\mathbf{n}!$ ) is defined as the product:

$$\mathbf{n}! \equiv (\mathbf{n})(\mathbf{n}-1)(\mathbf{n}-2)(\mathbf{n}-3)\dots(3)(2)(1), \quad [2.8a]$$

$$\mathbf{1}! \equiv \mathbf{0}! \equiv 1, \quad [2.8b]$$

along with *factorials* involving negative integers not being allowed.

**Seventh**, when data are used to determine the  $\{g_m; m = (0, M_F)\}$  constants for the Eq. [2.5a]  $N(Z)$  analytic approximation, an equivalently precise  $R(Z)$  is set by Eq. [2.2] and Eq. [2.5b], with its  $\{c_m; m = (0, M_F)\}$  constants being:

$$c_{M_F-k} = \sum_{m=0}^{m=k} g_m. \quad [2.9]$$

This simple form of Eq. [2.9] arises from the fact that  $L_m(Z = 0) = 1$ . Also, Eq. [2.5a] and Eq. [2.9] combine to give:

$$N(Z = 0) \equiv N(0) \equiv N[t \rightarrow \infty] = c_0 \equiv \sum_{m=0}^{m=M_F} g_m, \quad [2.10]$$

as a new predicted total number of CoVID-19 cases at pandemic end.

**Eighth**, the  $\{g_m; m = (0, M_F)\}$  constants can be arranged in a  $\vec{g}$ -vector form, with comparable constants for  $R(Z)$  from Eq. [2.2] arranged in a  $\vec{C}$ -vector form. It allows Eq. [2.9] to be written as:

$$\vec{C} = \begin{pmatrix} c_0 \\ c_1 \\ c_2 \end{pmatrix} = \begin{pmatrix} 1 & 1 & 1 \\ 0 & 1 & 1 \\ 0 & 0 & 1 \end{pmatrix} \vec{g} = \begin{pmatrix} 1 & 1 & 1 \\ 0 & 1 & 1 \\ 0 & 0 & 1 \end{pmatrix} \begin{pmatrix} g_0 \\ g_1 \\ g_2 \end{pmatrix}. \quad [2.11]$$

Once the  $\{g_m; m = (0, M_F)\}$  constants are found, the  $c_0$  value in Eq. [2.11] becomes the  $\{M_F + 1\}$ -term replacement value for the predicted total number of CoVID-19 cases at the pandemic end, which refines the initial  $N_{\max}^o$  value of Eq. [1.2b] or Eq. [2.1d]. How to determine  $\{K_A, G_o, \gamma_o\}$  and the  $\{g_m; m = (0, M_F)\}$  constants in Eq. [2.5a] from a given set of data, is derived next.

### 3 Finding $\{K_A, \gamma_o\}$ for $Z[t]$ from Data

For a given dataset, the *OFM* begins with using Eq. [1.2a] to set  $\{K_o, \alpha_S\}$ , as in our *Initial Model*. Society-wide *Social Distancing* is assumed to occur at or before the time  $t_I$ , where  $N_I$  cases are already observed. Since the most recently available data at  $t_F$  has  $N_F$  cases, Eq. [2.1a] becomes:

$$N[t_I] \approx \mathbf{1} \exp[+K_A t_I / (1 + \gamma_o t_I)] = N_I, \quad [3.1a]$$

$$N[t_F] \approx \mathbf{1} \exp[+K_A t_F / (1 + \gamma_o t_F)] = N_F, \quad [3.1b]$$

$$N[t \rightarrow \infty] \approx \mathbf{1} \exp[+K_A / \gamma_o] = N_{\max}^o, \quad [3.1c]$$

which using the new  $t = 0$  point for the *OFM*. Evaluating  $N[t < t_I]$  for  $t < t_I$  estimates what the pandemic prior history might have been, had society-wide *Social Distancing* already been in place. Evaluating  $N[t > t_F]$  for  $t > t_F$  estimates how the pandemic evolves assuming these *Social Distancing* measures remain in place. The prior Eq. [1.2a] gave:

$$N[t_F] = N_I \exp\{+K_o (t_F - t_I) / [1 + \alpha_S (t_F - t_I)]\}, \quad [3.2]$$

with the  $t_F \rightarrow 0$  limit of Eq. [3.2] giving:

$$N_I \exp[-K_o t_I / (1 - \alpha_S t_I)] \equiv \mathbf{1}, \quad [3.3a]$$

$$t_I = \ln(N_I) / [K_o + \alpha_S \ln(N_I)]. \quad [3.3b]$$

Here, Eq. [3.3b] sets the precise  $t_I$  time shift needed to convert from Eq. [1.2a] to Eq. [2.1a], which is easier to generalize. In addition, the  $t = 0$  point of Eq. [2.1a] gives  $N[t \rightarrow 0] = \mathbf{1}$  as an estimate for the pandemic starting point.

Since  $t_I$  and  $(t_F - t_I)$  sets  $t_F$ , the Eqs. [3.1a]-[3.1b] fully determine  $\{K_A, \gamma_o\}$ , without needing any recalculations on the original dataset. Taking various ratios of Eq. [3.1b] to Eq. [3.1a] gives:

$$\ln(N_F) / \ln(N_I) = \frac{t_F (1 + \gamma_o t_I)}{t_I (1 + \gamma_o t_F)}, \quad [3.4a]$$

$$\ln[N_F / N_I] = K_A \left[ \frac{t_F}{(1 + \gamma_o t_F)} - \frac{t_I}{(1 + \gamma_o t_I)} \right], \quad [3.4b]$$

as separable equations to first find  $\gamma_o$ , then  $K_A$ , with these results:

$$\gamma_o = \{ [\ln(N_I) / t_I] - [\ln(N_F) / t_F] \} / [\ln(N_F) - \ln(N_I)], \quad [3.5a]$$

$$K_A = [(1 / t_I) - (1 / t_F)] / \{ [1 / \ln(N_I)] - [1 / \ln(N_F)] \}, \quad [3.5b]$$

which sets the  $Z[t]$  function in Eq. [2.1c] or Eq. [2.4c].

### 4 Determining the $g_m$ Constants from Data

When data for  $N_{data}(Z)$  are given over the whole  $Z = \{0^+, \infty^-\}$  range, the  $g_n$  constants for Eq. [2.5a] are exactly determined via:

$$N_{data}(Z) = \sum_{m=0}^{m=M_F} g_m L_m(Z) \exp[-Z]. \quad [4.1a]$$

$$\int_{Z=0}^{Z=+\infty} L_n(Z) N_{data}(Z) dZ = \quad [4.1b]$$

$$\sum_{m=0}^{m=M_F} g_m \int_{Z=0}^{Z=+\infty} L_n(Z) L_m(Z) \exp[-Z] dZ \equiv g_n,$$

where the *Laguerre Polynomial* orthogonality condition of Eq. [2.7a] forces the Eq. [4.1b] sum to reduce to one term.

When the  $N_{data}(Z)$  only spans a finite range of:  $t_I < t < t_F$  and  $Z_{\min} < Z < Z_{\max}$ , an extrapolation of  $N_{data}(Z)$  for ( $Z < Z_{\min}$ ) and ( $Z > Z_{\max}$ ) is needed. One method could set  $N_{data}(Z < Z_{\min}) \equiv 0$  and  $N_{data}(Z > Z_{\max}) \equiv 0$ , which results in these Eqs. [4.1a]-[4.1b] cognates:

$$N_{data}(Z) = \sum_{m=0}^{m=M_F} \hat{g}_m L_m(Z) \exp[-Z], \quad [4.2a]$$

$$\int_{Z=Z_{\min}}^{Z=Z_{\max}} L_n(Z) N_{data}(Z) dZ = \quad [4.2b]$$

$$\sum_{m=0}^{m=M_F} \hat{g}_m \int_{Z=0}^{Z=+\infty} L_n(Z) L_m(Z) \exp[-Z] dZ \equiv \hat{g}_n .$$

Its advantages are: (a) for  $m \neq n$ , every  $\hat{g}_m$  and  $\hat{g}_n$  are independent, as in orthogonal functions; and (b) these  $\hat{g}_m$  values provide new estimates for the  $N_{data}(Z < Z_{\min})$  and  $N_{data}(Z > Z_{\max})$  regimes. But since  $N_{data}(Z < Z_{\min})$  and  $N_{data}(Z > Z_{\max})$  were originally assumed to vanish, this method is inconsistent. Alternatively, adding reasonable "tails" to the data could extend the original  $N_{data}(Z)$  domain, but those functions are not always known.

The third path, used here, takes the Eq. [4.1a] "final answer" as a *self-consistent* extrapolation for ( $Z < Z_{\min}$ ) and ( $Z > Z_{\max}$ ), while retaining the  $N_{data}(Z)$  values for the ( $Z_{\max} \geq Z \geq Z_{\min}$ ) regime. It replaces Eq. [4.1b] with:

$$g_n \equiv \sum_{m=0}^{m=M_F} g_m \int_{Z=0}^{Z=+\infty} L_n(Z) L_m(Z) \exp[-Z] dZ = \quad [4.3a]$$

$$\int_{Z=Z_{\max}}^{Z=+\infty} L_n(Z) N(Z) dZ + \int_{Z=Z_{\min}}^{Z=Z_{\max}} L_n(Z) N_{data}(Z) dZ + \int_{Z=0}^{Z=Z_{\min}} L_n(Z) N(Z) dZ ,$$

$$N(Z) = \sum_{m=0}^{m=M_F} g_m L_m(Z) \exp[-Z]. \quad [4.3b]$$

The  $\{g_m; m = (0, M_F)\}$  now appears on both sides of each Eq. [4.3a]  $g_n$ -equation, which is handled as follows. Defining:

$$Q_n \equiv \int_{Z=Z_{\min}}^{Z=Z_{\max}} L_n(Z) N_{data}(Z) dZ, \quad [4.4a]$$

$$K_{m,n} \equiv \int_{Z=Z_{\min}}^{Z=Z_{\max}} L_m(Z) L_n(Z) \exp(-Z) dZ = K_{n,m}, \quad [4.4b]$$

Eqs. [4.3a]-[4.3b] can be re-written as a  $3 \times 3$  matrix  $\underline{\mathbf{M}}_3$ , which relates a data-driven  $\vec{Q}_3$ -vector to a resultant  $\vec{g}_3$ -vector:

$$\vec{Q}_3 = \underline{\mathbf{M}}_3 \vec{g}_3, \quad [4.5a]$$

$$\begin{pmatrix} Q_0 \\ Q_1 \\ Q_2 \end{pmatrix} = \begin{pmatrix} K_{0,0} & K_{0,1} & K_{0,2} \\ K_{1,0} & K_{1,1} & K_{1,2} \\ K_{2,0} & K_{2,2} & K_{2,2} \end{pmatrix} \begin{pmatrix} g_0 \\ g_1 \\ g_2 \end{pmatrix}. \quad [4.5b]$$

$$(\underline{\mathbf{M}}_3)^{-1} \vec{Q}_3 \equiv \vec{g}_3, \quad [4.5c]$$

where  $(\underline{\mathbf{M}}_3)^{-1}$  is the matrix inverse of  $\underline{\mathbf{M}}_3$ . When  $\{Z_{\min}, Z_{\max}\} \rightarrow \{0, +\infty\}$ , this  $\underline{\mathbf{M}}_3$  becomes the Identity Matrix. The following  $k_{m,n}(Z)$  integrals set  $K_{m,n}$ :

$$k_{m,n}(Z) = \int_{Z'=Z}^{Z'=+\infty} L_m(Z') L_n(Z') \exp(-Z') dZ' = k_{n,m}(Z), \quad [4.6a]$$

$$K_{m,n} \equiv k_{m,n}(Z_{\min}) - k_{m,n}(Z_{\max}) = K_{n,m}. \quad [4.6b]$$

The  $k_{m,n}(Z)$  integrals can be determined using Eq. [2.7c], which gives:

$$k_{0,0}(Z) = 1 \exp(-Z), \quad [4.7a]$$

$$k_{1,1}(Z) = \{1 + Z^2\} \exp(-Z), \quad [4.7b]$$

$$k_{2,2}(Z) = \{1 + 2Z^2 - Z^3 + \frac{1}{4}Z^4\} \exp(-Z), \quad [4.7c]$$

$$k_{0,1}(Z) = (-Z) \exp(-Z), \quad [4.7d]$$

$$k_{0,2}(Z) = (-Z) \{1 - \frac{1}{2}Z\} \exp(-Z), \quad [4.7e]$$

$$k_{1,2}(Z) = (-Z) \{1 - Z + \frac{1}{2}Z^2\} \exp(-Z). \quad [4.7f]$$

To extract  $\{g_0, g_1, g_2\}$ , the  $3 \times 3$  symmetric  $\underline{\mathbf{M}}_3$  matrix needs inversion:

$$\underline{\mathbf{M}} = \begin{pmatrix} a & d & f \\ d & b & e \\ f & e & c \end{pmatrix}, \quad [4.8a]$$

$$\det[\underline{\mathbf{M}}] \equiv [abc - ae^2 - bf^2 - cd^2 + 2def], \quad [4.8b]$$

$$\det[\underline{\mathbf{M}}] (\underline{\mathbf{M}})^{-1} \equiv \begin{pmatrix} [bc - e^2] & -(cd - ef) & -(bf - de) \\ -(cd - ef) & [ac - f^2] & -(ae - df) \\ -(bf - de) & -(ae - df) & [ab - d^2] \end{pmatrix}, \quad [4.8c]$$

which determines  $\{g_0, g_1, g_2\}$  from the  $\{Q_0, Q_1, Q_2\}$  data. A best fit  $N(Z)$  for  $Z = \{0^+, \infty^-\}$  results, along with an equivalent fit for  $R(Z)$  using Eq. [2.9].

Instead of having to find the best  $\{g_0, g_1, g_2\}$  triplet, one could find the best  $\{g'_0, g'_1\}$  by just using  $\{Q_0, Q_1\}$  and an  $\underline{\mathbf{M}}_2$  sub-matrix; or one could find the best  $\{g_0^+\}$  by itself by just using  $\{Q_0\}$  and an  $\underline{\mathbf{M}}_1$  sub-matrix:

$$\vec{Q}_2 = \underline{\mathbf{M}}_2 \vec{g}_2, \quad [4.9a]$$

$$\begin{pmatrix} Q_o \\ Q_1 \end{pmatrix} = \begin{pmatrix} K_{0,0} & K_{0,1} \\ K_{1,0} & K_{1,1} \end{pmatrix} \begin{pmatrix} g'_0 \\ g'_1 \end{pmatrix}, \quad [4.9b]$$

$$\begin{pmatrix} g'_0 \\ g'_1 \end{pmatrix} = \begin{pmatrix} K_{0,0} & K_{0,1} \\ K_{1,0} & K_{1,1} \end{pmatrix}^{-1} \begin{pmatrix} Q_o \\ Q_1 \end{pmatrix} = \frac{1}{[K_{0,0}K_{1,1} - K_{0,1}K_{1,0}]} \begin{pmatrix} K_{1,1} & K_{1,0} \\ K_{0,1} & K_{0,0} \end{pmatrix} \begin{pmatrix} Q_o \\ Q_1 \end{pmatrix}, \quad [4.9c]$$

$$\vec{Q}_1 = \underline{\mathbf{M}}_1 \vec{g}_1, \quad [4.9d]$$

$$\begin{pmatrix} Q_o \end{pmatrix} = \begin{pmatrix} K_{0,0} \end{pmatrix} \begin{pmatrix} g_o^+ \end{pmatrix}, \quad [4.9e]$$

$$\begin{pmatrix} g_o^+ \end{pmatrix} = \begin{pmatrix} K_{0,0} \end{pmatrix}^{-1} \begin{pmatrix} Q_o \end{pmatrix}. \quad [4.9f]$$

When the  $N_{data}(Z)$  is comprised of  $j = \{1, 2, \dots, J\}$  discrete values between  $\{Z_{\min}, Z_{\max}\}$ , with each  $Z_j$  having an  $N_{data}^{(j)}(Z_j)$  value, the Eq. [4.4a] integral needs to be replaced by a sum. Let:

$$Z_j \equiv +[G_o / (1 + \gamma_o t_j)], \quad [4.10]$$

with  $Z_0 = Z_1$  and  $Z_{J+1} = Z_J$ , the  $Q_n$  replacement for Eq. [4.4a] is:

$$Q_n \equiv \sum_{j=1}^{j=J} L_n(Z_j) N_{data}^{(j)}(Z_j) \Delta_j. \quad [4.11a]$$

$$\Delta_j \equiv \frac{1}{2}|Z_{j+1} - Z_{j-1}|, \quad [4.11b]$$

with the  $N[t]$  and  $\rho[t]$  being set by Eq. [2.3] and Eqs. [2.4a]-[2.4c].

Finally, the Eqs. [4.7a]-[4.7f]  $k_{m,n}(Z)$  integrals are easy to compute for  $0 \leq m \leq 2$  and  $0 \leq n \leq 2$ . But the general case is not well-known or tabulated in many *Tables of Integrals*. The key is how to express a product of two *Laguerre Polynomials* efficiently as a sum over a larger set of single *Laguerre Polynomials*, so as to convert the Eq. [4.6a] integrals into the Eq. [2.7c] form.



This problem was originally solved by G. N. Watson<sup>7</sup> in 1938, and simplified by J. Gillis and G. Weiss<sup>8</sup> in 1960. It is a sum of terms, where each coefficient contains four different *factorials* involving integers. Their key result is:

$$L_r(Z) L_s(Z) = \sum_{t=|r-s|}^{t=(r+s)} C_{rst} L_t(Z), \quad [4.12a]$$

$$C_{rst} = \int_{X=0}^{X=+\infty} L_r(X) L_s(X) L_t(X) \exp(-X) dX, \quad [4.12b]$$

$$C_{rst} \equiv \frac{(-1)^p}{2^p} \sum_{n=0}^{n=(r+s)} (2^{2n}) \frac{(r+s-n)!}{(r-n)! (s-n)! (2n-p)! (p-n)!}, \quad [4.12c]$$

$$p \equiv (r + s - t), \quad [4.12d]$$

where ALL terms in the sum for  $n = \{0, (r + s)\}$  also have an implicit requirement that none of the integer arguments for any of the *factorials* can be negative. Thus, all terms with negative arguments for the *factorial* must be omitted. Nowadays, this calculation can be done on a computer, but it would have been difficult in 1960, and nearly impossible in 1938.

## 5 USA: Orthogonal Function Model Results

This USA analysis only uses data after mid-March 2020, when several State Governors instituted mandatory *Mitigation Measures*. The widely available *bing.com* CoVID-19 data<sup>9</sup> for the USA had these limits:

$$N_I[t_I \leftrightarrow 3/21/2020]_{day\#1} = \{25, 722\}, \quad [5.1a]$$

$$N_F[t_F \leftrightarrow 5/03/2020]_{day\#44} = \{1, 183, 653\}, \quad [5.1b]$$

with  $(t_F - t_I) = 43$  days. Our *Initial Model* of Eq. [1.2a] sets these parameter values for the USA :

$$K_o = \{0.3248758 / day\}, \quad [5.2a]$$

$$\alpha_S = \{0.06159 / day\}, \quad [5.2b]$$

$$N[t \rightarrow \infty] \approx N_I \exp[+K_o / \alpha_S] = N_{\max}^o \equiv \{5, 024, 900\}. \quad [5.2c]$$

Using Eq. [3.3b] for  $t_I$  and  $t_F$  sets:

$$t_I = \ln(N_I) / [K_o + \alpha_S \ln(N_I)] = \{10.685885 \text{ days}\}, \quad [5.3b]$$

$$t_F = t_I + \{43 \text{ days}\} = \{53.685885 \text{ days}\}, \quad [5.3c]$$

for use in the *OFM*. **Figures 2-3** show how this *Initial Model*, by itself, compares to the USA CoVID-19 data. **Figure 2** uses a logarithmic Y-axis for the predicted total number of CoVID-19 cases, and **Figure 3** shows the daily new CoVID-19 case predictions on a linear Y-axis plot.

The daily new case data exhibits large day-to-day variations, likely due to reporting delays, among other factors. This *Initial Model* for the USA has a predicted maximum of ~31,760 new cases per day at Day 37.686 on 4/17/2020, along with ~6,757 new cases per day still occurring at Day 200 on 9/26/2020.

The time axis in **Figure 2** is different than in our previous paper<sup>2</sup>, due to the time shift of Eq. [2.1a], where the new  $t = 0$  point estimates the CoVID-19 pandemic starting point being on 3/10/2020. Even if *Social Distancing* had been in effect at the start of the pandemic, **Figure 2** shows that the  $N_I[t_I] = \{25, 722\}$  level still could have been reached in 10 – 11 days.

**Figures 3** compares the measured data for the total number of CoVID-19 cases after *Social Distancing* started, to the early-time portion of this *Initial Model*. That comparison shows that the early-time data starts off a little below the curve; the later-time data rises a bit above the curve; and the final-time data again matches the curve, since it is a fixed point for this analysis.

These predictions assume: (I) The present *Mitigation Measures* are continued; (II) No "second wave" of infection or re-infection occurs; and (III) No further *Mitigation Measures* are taken to reduce the number of CoVID-19 cases.

These *Initial Model* results are first refined by applying the Eq. [2.1a] time shift, with Eqs. [3.5a]-[3.5b] setting these  $\{\gamma_o, K_A, G_o\}$  values:

$$\gamma_o = \{0.1801634 \text{ /day}\}, \quad [5.4a]$$

$$K_A = \{2.779906 \text{ /day}\}, \quad [5.4b]$$

$$G_o \equiv [K_A / \gamma_o] = \{15.4299153\}, \quad [5.4c]$$

where Eq. [3.1c] also gives:

$$\lim_{t \rightarrow \infty} \{ \mathbf{1} \exp[+\frac{K_A t}{(1+\gamma_o t)}] \} = \mathbf{1} \exp[+\frac{K_A}{\gamma_o}] = N_{\max}^o \approx \{5,024,900\}, \quad [5.5]$$

which matches Eq. [5.2c], as it should. Then:

$$Z[t] = +[G_o / (1 + \gamma_o t)] = [15.4299153 / (1 + 0.1801634 t)], \quad [5.6]$$

defines  $Z$  for the *OFM*, where:

$$Z_{\min}[t_F \approx 53.686] = +[G_o / (1 + \gamma_o t_F)] = 1.4458002586, \quad [5.7a]$$

$$Z_{\max}[t_I \approx 10.686] = +[G_o / (1 + \gamma_o t_I)] = 5.2748142044. \quad [5.7b]$$

The resultant Eq. [4.5b]  $\underline{\mathbf{M}}_3$  matrix of  $K_{m,n}$  entries is:

$$\underline{\mathbf{M}}_3 = \begin{pmatrix} K_{0,0} & K_{0,1} & K_{0,2} \\ K_{1,0} & K_{1,1} & K_{1,2} \\ K_{2,0} & K_{2,2} & K_{2,2} \end{pmatrix} = \begin{pmatrix} +0.23044 & -0.31357 & -0.13858 \\ -0.31357 & +0.58041 & +0.05609 \\ -0.13858 & +0.05609 & +0.23635 \end{pmatrix}. \quad [5.8]$$

It has a rather small  $\det[\underline{\mathbf{M}}_3] = 0.001375$  value, with an inverse of:

$$(\underline{\mathbf{M}}_3)^{-1} \equiv \begin{pmatrix} 97.478 & 48.246 & 45.707 \\ 48.246 & 25.643 & 22.204 \\ 45.707 & 22.204 & 25.762 \end{pmatrix}. \quad [5.9]$$

A convolution of  $L_m(Z)$  functions with the measured  $\vec{Q}_3$  dataset vector of Eqs. [4.11a]-[4.11b], along with the above  $(\underline{\mathbf{M}}_3)^{-1}$ , gives this final  $\vec{g}$ -vector:

$$\begin{aligned} (\underline{\mathbf{M}}_3)^{-1} \vec{Q}_3 &\equiv (\underline{\mathbf{M}}_3)^{-1} \begin{pmatrix} Q_o \\ Q_1 \\ Q_2 \end{pmatrix} = (\underline{\mathbf{M}}_3)^{-1} \begin{pmatrix} +1,169,103 \\ -1,576,445 \\ -722,430 \end{pmatrix} \equiv \\ \vec{g}_3 &= \begin{pmatrix} g_o \\ g_1 \\ g_2 \end{pmatrix} = \begin{pmatrix} +4,884,354 \\ -60,065 \\ -178,415 \end{pmatrix}, \quad [5.10] \end{aligned}$$

determining the constants needed for  $N(Z)$  in Eq. [2.5a]. The coefficients for  $R(Z)$ , which sets the predicted number of daily new CoVID-19 cases, are:

$$\vec{C}_3 = \begin{pmatrix} 1 & 1 & 1 \\ 0 & 1 & 1 \\ 0 & 0 & 1 \end{pmatrix} \vec{g}_3 = \begin{pmatrix} c_0 \\ c_1 \\ c_2 \end{pmatrix} = \begin{pmatrix} +4,645,874 \\ -238,480 \\ -178,415 \end{pmatrix}, \quad [5.11]$$

determining the constants needed for  $R(Z)$  in Eq. [2.5b]. Using these  $\{g_0, g_1, g_2\}$  values along with Eq. [2.11] gives:

$$N(0) \equiv N[t \rightarrow \infty] = c_0 \equiv \{4,645,874\}, \quad [5.12]$$

as a new predicted total number of CoVID-19 cases at the pandemic end for the *OFM*, which is a  $\sim 7.54\%$  or 379,026 reduction in the number of cases, compared to the *Initial Model*  $N_{\max}^o$  value of Eq. [5.5].

Using Eq. [2.4c] for  $Z[t]$ , and substituting the Eq. [5.12]  $\vec{C}_3$  values into Eq. [2.5b] gives  $R(Z)$ . The  $\rho[t]$  in Eq. [2.4a] is derived from  $R(Z)$  using Eq. [2.4b], with the resulting *OFM*  $\rho[t]$  plotted in **Figure 4**, using a linear Y-axis, along with the  $t > t_I$  raw data for the daily new CoVID-19 cases.

Raw data for  $t < t_I$  was not included in these analyses, because they cover the exponential rise period, prior to *Social Distancing*. Those data are not applicable to estimating *Social Distancing* effects.

However, the **Figure 4** *OFM* provides an extrapolation for those  $t < t_I$  times, which shows what an exponential rise plus lengthening *doubling times* would have looked like, if both had been operating continuously from the CoVID-19 pandemic start. The companion  $N[t]$  analytic result, plotted using a logarithmic Y-axis, along with the  $t > t_I$  raw data for the total number of CoVID-19 cases, is shown in **Figure 5**.

Comparing the size and timing of the  $\rho[t]$  pandemic peak, and its Day 200 value, between the *Initial Model* (**Figs. 2-3**) and *OFM* (**Figs. 4-5**), gives:

$$\begin{pmatrix} \text{Parameter} & \text{Initial Model} & \text{Orthog. Func. Model} \\ N[t \rightarrow \infty] & 5,024,900 & 4,645,874 \\ \max\{\rho[t_p]\} & 31,760 / \text{day} & 32,069 / \text{day} \\ [t_p] \text{ Date} & 4/17/2020 & 4/15/2020 \\ \frac{200}{\text{Day}} \rho[t] & 6,757 & 5,962 / \text{day} \end{pmatrix}. \quad [5.13]$$

This table shows that the *OFM* predicts fewer total cases ( $N_{\max}^o$  vs  $c_o$ ) and fewer daily new CoVID-19 cases at Day 200, as well as giving an earlier and higher pandemic peak prediction.

While the above analysis used  $M_F = 2$  with Eq. [5.10]  $\vec{g}_3$  setting the best  $\{g_0, g_1, g_2\}$  values, the *OFM* also provides estimates for the simpler  $M_F = \{0, 1\}$  cases, as outlined by Eqs. [4.9a]-[4.9f]. For  $M_F = 1$ , the best two  $\{g'_0, g'_1\}$  values are gotten by only using  $\{Q_0, Q_1\}$  and an  $\underline{\mathbf{M}}_2$  sub-matrix of  $\underline{\mathbf{M}}_3$ . For  $M_F = 0$ , the best  $\{g_0^+\}$  by itself is derived by using  $\{Q_0\}$  and the  $\underline{\mathbf{M}}_1$  sub-matrix. These alternative estimates give:

$$\vec{g}_2 = \begin{pmatrix} g'_0 \\ g'_1 \end{pmatrix} = \begin{pmatrix} +0.23044 & -0.31357 \\ -0.31357 & +0.58041 \end{pmatrix}^{-1} \begin{pmatrix} +1,169,103 \\ -1,576,445 \end{pmatrix} \\ = \begin{pmatrix} 5,200,870 \\ 93,713 \end{pmatrix}, \quad [5.14a]$$

$$\vec{g}_1 = (g_0^+) = (+0.23044)^{-1} (+1169103) = (5,073,351). \quad [5.14b]$$

These additional calculations give the following progression of estimates for  $N[t \rightarrow \infty]$ , which is the final number of CoVID-19 cases at the pandemic end:

$$\begin{pmatrix} N_{\max}^o \\ g_0^+ \\ c'_o = g'_0 + g'_1 \\ c_o = g_0 + g_1 + g_2 \end{pmatrix} = \begin{pmatrix} 5,024,900 \\ 5,073,351 \\ 5,294,583 \\ 4,645,874 \end{pmatrix}, \quad [5.15]$$

These Eq. [5.15] results show that the  $N[t \rightarrow \infty]$  projected final number of CoVID-19 cases remains fairly stable, even as the number of data fitting

parameters is increased from 0 to 3. The average and  $1\sigma$  standard deviation among these  $N[t \rightarrow \infty]$  projections is:

$$\langle N_{\max} \rangle = 5,009,677 \pm 269,450, \quad [5.16]$$

where  $1\sigma$  is  $\sim 5.4\%$  of the overall average.

Comparing the results among **Figs. 2-5** highlights several items:

- (a) All  $\rho[t]$  functions have a sharp rise, and a much slower decreasing tail.
- (b) The overall fit-to-data, as given in **Fig. 3** and **Fig. 5**, shows that the extra parameters in the *OFM* can fit the  $\rho[t]$  shape better.
- (c) The *OFM* helps to estimate the uncertainty in the *Initial Model*, which Eq. [5.16] showed was  $\sim 5.4\%$ .
- (d) These results, taken together, exhibit only a relatively small change in the  $N[t \rightarrow \infty]$  limits. Thus, the *Initial Model* function captures much of the progression to pandemic shutoff.

The  $\rho[t]$  tail may still differ from these predictions, due to factors such as:

- (i) The CoVID-19 dynamics may change in the long-term low  $\rho[t]$  regime;
- (ii) A "second wave" or multiple waves of  $\rho[t]$  rise and fall may occur; both of which are beyond the scope of this CoVID-19 pandemic modeling;
- (iii) Using just an exponential rise at the CoVID-19 pandemic start, plus lengthening *doubling times*, may limit how much mitigation can be easily modeled using only a few adjustable parameters.

**Figure 4** provides some evidence for the above (iii) possibility. While lengthening the *doubling time* enables pandemic shutoff in the long time *dilute pandemic* limit; **Figure 4** also shows that this model tends to approach final pandemic shutoff rather slowly.

## 6 USA Data: The *bing.com* Change

This analysis of the *bing.com* USA data begins at mid-March 2020, when mandatory *Mitigation Measures* were instituted. However, in early-May, *bing.com* changed their entire database, revising all numerical values back to the start of their reporting history.

The revised *bing.com* USA data from mid-March through early-June is analyzed next, which had these values:

$$N'_I[t_I \leftrightarrow 3/21/2020]_{day\#1} = \{23, 710\}, \quad [6.1a]$$

$$N'_J[t_J \leftrightarrow 5/03/2020]_{day\#44} = \{1, 177, 014\}, \quad [6.1b]$$

$$N'_F[t_F \leftrightarrow 6/07/2020]_{day\#79} = \{1, 920, 628\}, \quad [6.1c]$$

covering  $(t'_F - t'_I) = 78$  *days*, as compared to the original *bing.com* data, which was used in above analyses, and only spanned  $(t_F - t_I) = 43$  *days*. The Eqs. [6.1a]-[6.1b] revised  $\{day\#1, day\#44\}$  values are  $\{\sim 7.82\%, \sim 0.56\%\}$  lower than the original Eqs. [5.1a]-[5.1b] data.

Applying the *Initial Model* to this revised dataset gives:

$$K'_o = \{0.3471686 / day\}, \quad [6.2a]$$

$$\alpha'_S = \{0.06618 / day\}, \quad [6.2b]$$

$$N[t \rightarrow \infty] \approx N'_I \exp[+K'_o / \alpha'_S] = N_{\max}^1 \equiv \{4, 499, 494\}. \quad [6.2c]$$

Using Eq. [3.3b] gives these  $t'_I$  and  $t'_F$  results:

$$t'_I = \ln(N'_I) / [K'_o + \alpha'_S \ln(N'_I)] = \{9.9361076 \text{ days}\}, \quad [6.3a]$$

$$t'_F = t_I + \{78 \text{ days}\} = \{87.9361076 \text{ days}\}, \quad [6.3b]$$

for use in the *OFM*. The Eq. [6.2c] calculated  $N_{\max}^1$  value is  $\sim 10.456\%$  lower than the prior  $N_{\max}^o$  of Eq. [5.5]. Since the *Initial Model* uses an *rms* best fit on logarithmic axes for  $N[t]$ , it emphasizes differences at low  $N[t]$  values, where the revised *bing.com* data changes were larger. Thus, some of the  $\sim 10.456\%$  change in  $N_{\max}^1$  may be due to the revised *bing.com* data, but the longer  $(t'_F - t'_I)$  data interval also contributes to modifying the  $\{K'_o, \alpha'_S\}$  values.

The *Initial Model* datafit for the revised USA data is shown in **Figures 6-7**, and is a better datafit than the *Initial Model* results of **Figures 2-3**. Comparing the *OFM* result of Eq. [5.12], which gave  $N[t \rightarrow \infty] = \{4, 645, 874\}$ , to the *Initial Model* result of Eq. [6.2c] shows that they differ by just  $\sim 3.25\%$ .

Next, the *OFM* is applied to further refine this *Initial Model* prediction. Those results are shown in **Figure 8** and **Figure 9**, which were derived as follows. First, the Eqs. [2.1a]-[2.1d] time-shift was done:

$$\gamma'_o = \{0.183266685 \text{ /day}\}, \quad [6.4a]$$

$$K'_A = \{2.96074425 \text{ /day}\}, \quad [6.4b]$$

$$G'_o \equiv [K'_A / \gamma'_o] = \{15.31947555\}, \quad [6.4c]$$

$$N[t] \approx \mathbf{1} \exp[+K'_A t / (1 + \gamma'_o t)] = \exp[+G'_o] \exp[-Z] = N_{\max}^1, \quad [6.4d]$$

$$Z[t] \equiv +[G'_o / (1 + \gamma'_o t)] = [15.31947555 / (1 + 0.183266685 t)], \quad [6.4e]$$

for this dataset. Next, using Eqs. [6.3a]-[6.3b] for  $\{t'_I, t'_F\}$  gives:

$$Z_{\min}[t'_F \approx 87.936] = +[G'_o / (1 + \gamma'_o t'_F)] = 0.851312775, \quad [6.5a]$$

$$Z_{\max}[t'_I \approx 10.686] = +[G'_o / (1 + \gamma'_o t'_I)] = 5.245823369. \quad [6.5b]$$

The  $\underline{\mathbf{M}}_3$  matrix of  $K_{m,n}$  entries, as set by the  $\{Z_{\min}, Z_{\max}\}$  values, is:

$$\underline{\mathbf{M}}_3 = \begin{pmatrix} K_{0,0} & K_{0,1} & K_{0,2} \\ K_{1,0} & K_{1,1} & K_{1,2} \\ K_{2,0} & K_{2,2} & K_{2,2} \end{pmatrix} = \begin{pmatrix} +0.421584 & -0.335744 & -0.253505 \\ -0.335744 & +0.585931 & +0.077270 \\ -0.253505 & +0.077270 & +0.306047 \end{pmatrix}, \quad [6.6]$$

and it has an inverse of:

$$(\underline{\mathbf{M}}_3)^{-1} \equiv \begin{pmatrix} 12.309835 & 5.9056154 & 8.7054293 \\ 5.9056154 & 4.5986723 & 3.7306718 \\ 8.7054293 & 3.7306718 & 9.5364244 \end{pmatrix}. \quad [6.7]$$

The  $\vec{Q}_3$ -vector for this dataset gives this updated  $\vec{g}_3$ -vector:

$$(\underline{\mathbf{M}}_3)^{-1} \vec{Q}_3 \equiv (\underline{\mathbf{M}}_3)^{-1} \begin{pmatrix} Q_o \\ Q_1 \\ Q_2 \end{pmatrix} = (\underline{\mathbf{M}}_3)^{-1} \begin{pmatrix} +1,896,161 \\ -1,507,039 \\ -1,156,648 \end{pmatrix} \equiv \vec{g}_3 = \begin{pmatrix} g_o \\ g_1 \\ g_2 \end{pmatrix} = \begin{pmatrix} +4,372,319 \\ -47,455 \\ -145,659 \end{pmatrix}. \quad [6.8]$$

where  $c_0 = (g_0 + g_1 + g_2) = (4,179,205) = N[t \rightarrow \infty]$  is the new *OFM* predicted total number of CoVID-19 cases, which is down from the *Initial Model* value of  $\exp[+K'_A / \gamma'_o] = N_{\max}^1 = (4,499,494)$  from Eq. [6.2c]. This  $\sim 7.12\%$  reduction is similar to the  $\sim 7.42\%$  change between Eq. [5.12] and Eq. [5.5]. A similar analysis for  $\vec{g}_2$  and  $\vec{g}_1$ , using Eqs. [4.9a]-[4.9f], gives this summary:

$$\begin{pmatrix} N_{\max}^1 \\ g_o^+ \\ c'_o = g'_0 + g'_1 \\ c_o = g_0 + g_1 + g_2 \end{pmatrix} = \begin{pmatrix} 4,499,494 \\ 4,497,699 \\ 4,514,812 \\ 4,179,205 \end{pmatrix}. \quad [6.9]$$

The  $N[t \rightarrow \infty]$  projected final number of CoVID-19 cases in Eq. [6.9] remains fairly stable, even as the number of data fitting parameters is increased from 0 to 3. This result is similar to the Eq. [5.15] analysis of the original *bing.com* data, which spanned only  $(t_F - t_I) = 43 \text{ days}$ . The average and  $1\sigma$  standard deviation among these Eq. [6.9] calculations for  $N[t \rightarrow \infty]$  is:

$$\langle N_{\max} \rangle = 4,422,803 \pm 162,580, \quad [6.10]$$

where  $1\sigma$  is  $\sim 3.68\%$  of the overall average. It is somewhat lower than the  $\sim 5.14\%$  value of Eq. [5.16]. Thus, having  $(t'_F - t'_I) = 78 \text{ days}$  of data for analysis reduces the overall uncertainty in these projections.

Comparing Eq. [6.9] to Eq. [5.15] also shows the following trends. The 1-term calculations, using either  $\{N_{\max}\}$  or just  $\{g_o^+\}$  by itself, give similar results. The 2-term calculations, using  $\{g'_0, g'_1\}$  gives  $\lesssim 10\%$  higher results, while using  $\{g_0, g_1, g_2\}$  gives  $\lesssim 10\%$  lower results. This oscillation around the average value of Eq. [6.10] shows that the *Initial Model* of Eq. [2.1a] and Eq. [6.4d] capture much of how *Social Distancing* enables pandemic shutoff.

Comparing the **Fig. 6** *Initial Model* and the **Fig. 8** *OFM* for the pandemic peak size, timing, and Day 200 values gives :

$$\begin{pmatrix} \text{Parameter} & \text{Initial Model} & \text{Orthog. Func. Model} \\ N[t \rightarrow \infty] & 4,499,494 & 4,179,205 \\ \max\{\rho[t_p]\} & 30,727 / \text{day} & 30,909 / \text{day} \\ [t_p] \text{ Date} & 4/15/2020 & 4/13/2020 \\ \frac{200}{\text{Day}} \rho[t] & 5,783 & 5,140 / \text{day} \end{pmatrix}. \quad [6.11]$$

The  $\rho[t]$  at 200-days nearly scales with  $N[t \rightarrow \infty]$ , while the *OFM* predicts a higher and earlier  $\rho[t]$  pandemic peak. Comparing the revised *bing.com* 78-day dataset up through 6/7/2020 of Eq. [6.11], to the original *bing.com* 43-day dataset up through 5/3/2020 of Eq. [5.13] gives:

$$\begin{pmatrix} \frac{6/7/2020 \text{ vs.}}{5/3/2020} & \text{Initial Model} & \text{Orthog. Func. Model} \\ N[t \rightarrow \infty] & -8.95\% & -9.00\% \\ \max\{\rho[t_p]\} & -9.67\% & -9.64\% \\ [t_p] \text{ Date} & -2 \text{ days} & -2 \text{ days} \\ \frac{200}{\text{Day}} \rho[t] & -8.56\% & -8.62\% \end{pmatrix}. \quad [6.12]$$

Both the *Initial Model* and the *OFM* found a comparable amount of change between the two datasets; likely due to the revised *bing.com* values being lower, along with the larger dataset enabling increased modeling precision.

The *Initial Model* and the *OFM* also provide self-consistent CoVID-19 predictions over the two different time periods. Each model held its predictive power to within  $< 10\%$  for over a month  $\{43 \text{ days vs. } 78 \text{ days}\}$ , without needing recalculations or parameter value changes, which provides a strong data-driven validation of the potential utility of these models. When the *Initial Model* is a somewhat good fit, this *Orthogonal Function Model* provides even better fits.

## 7 Italy: Revised *bing.com* Data Analysis

This Italy analysis uses data beginning on Feb. 23, 2020, from the revised *bing.com* CoVID-19 database<sup>9</sup>, which has these values:

$$N_I[t_I \leftrightarrow 2/23/2020]_{day\#1} = \{150\}, \quad [7.1a]$$

$$N_F[t_F \leftrightarrow 6/15/2020]_{day\#114} = \{237, 290\}, \quad [7.1b]$$

with  $(t_F - t_I) = 113$  days. The number of daily new CoVID-19 cases shows a sharp post-peak decrease for Italy, in contrast the the above USA data. That sharp decrease provides a near-worst case test for the *OFM*. The *Initial Model* best fit on a logarithmic Y-axis, gives these initial parameters:

$$K_o = \{0.665772 / day\}, \quad [7.2a]$$

$$\alpha_S = \{0.08153 / day\}. \quad [7.2b]$$

Using Eq. [3.3b] for  $t_I$  and  $t_F$  gives:

$$N[t \rightarrow \infty] \approx N_I \exp[+K_o / \alpha_S] = N_{\max}^o \equiv \{527, 875\}, \quad [7.3a]$$

$$t_I = \ln(N_I) / [K_o + \alpha_S \ln(N_I)] = \{4.66414 \text{ days}\}, \quad [7.3b]$$

$$t_F = t_I + \{113 \text{ days}\} = \{117.66414 \text{ days}\}, \quad [7.3c]$$

for use in the *OFM*. The revised *bing.com* Italy data and the *Initial Model* datafit are shown in **Figure 10** and its inset. The *Initial Model* is not a good fit due to the high curvature of the data on the logarithmic Y-axis, which is similar to our previous<sup>2</sup> results for Italy. The *OFM* is applied next.

Using Eqs. [3.5a]-[3.5b] sets these  $\{\gamma_o, K_A, G_o\}$  values:

$$\gamma_o = \{0.1316771 / day\}, \quad [7.4a]$$

$$K_A = \{1.734075 / day\}, \quad [7.4b]$$

$$G_o \equiv [K_A / \gamma_o] = \{13.1691513\}, \quad [7.4c]$$

where Eq. [3.1c] also gives:

$$\lim_{t \rightarrow \infty} \{1 \exp[+\frac{K_A t}{(1+\gamma_o t)}]\} = 1 \exp[+\frac{K_A}{\gamma_o}] = N_{\max}^o \equiv \{527, 875\}, \quad [7.5]$$

which matches Eq. [7.3a], as it should. Then:

$$Z[t] = +[G_o / (1 + \gamma_o t)] = [13.1691513 / (1 + 0.1316771 t)], \quad [7.6]$$

defines  $Z$  for the *OFM*, where:

$$Z_{\min}[t_F \approx 117.664] = +[G_o / (1 + \gamma_o t_F)] = 0.7995757039, \quad [7.7a]$$

$$Z_{\max}[t_I \approx 4.664] = +[G_o / (1 + \gamma_o t_I)] = 8.1659787106. \quad [7.7b]$$

The resultant symmetric matrix  $\underline{\mathbf{M}}_3$  of  $K_{m,n}$  entries is:

$$\underline{\mathbf{M}}_3 = \begin{pmatrix} K_{0,0} & K_{0,1} & K_{0,2} \\ K_{1,0} & K_{1,1} & K_{1,2} \\ K_{2,0} & K_{2,2} & K_{2,2} \end{pmatrix} = \begin{pmatrix} +.4492355 & -.3571046 & -.2228851 \\ -.3571046 & +.7176744 & -.1261928 \\ -.2228851 & -.1261928 & +.6411040 \end{pmatrix} \quad [7.8]$$

It has an  $(\underline{\mathbf{M}}_3)$  inverse of:

$$(\underline{\mathbf{M}}_3)^{-1} \equiv \begin{pmatrix} 7.1590423 & 4.1432777 & 3.3044492 \\ 4.1432777 & 3.8412565 & 2.1965449 \\ 3.3044492 & 2.1965449 & 3.1409889 \end{pmatrix}. \quad [7.9]$$

A convolution of  $L_m(Z)$  functions with the measured data sets  $\vec{Q}_3$  using Eqs. [4.11a]-[4.11b], with  $(\underline{\mathbf{M}}_3)^{-1}$  of Eq. [4.5c] giving this final  $\vec{g}$ -vector:

$$(\underline{\mathbf{M}}_3)^{-1} \vec{Q}_3 \equiv (\underline{\mathbf{M}}_3)^{-1} \begin{pmatrix} Q_o \\ Q_1 \\ Q_2 \end{pmatrix} = (\underline{\mathbf{M}}_3)^{-1} \begin{pmatrix} +298, 131 \\ -206, 004 \\ -190, 856 \end{pmatrix} \equiv$$

$$\vec{g}_3 = \begin{pmatrix} g_0 \\ g_1 \\ g_2 \end{pmatrix} = \begin{pmatrix} 650,127 \\ 24,702 \\ -66,815 \end{pmatrix}. \quad [7.10]$$

The coefficients for  $R(Z)$ , which set the predicted number of daily new CoVID-19 cases for the *OFM*, are given by:

$$\vec{C}_3 = \begin{pmatrix} 1 & 1 & 1 \\ 0 & 1 & 1 \\ 0 & 0 & 1 \end{pmatrix} \vec{g}_3 = \begin{pmatrix} c_0 \\ c_1 \\ c_2 \end{pmatrix} = \begin{pmatrix} +608,013 \\ -42,113 \\ -66,815 \end{pmatrix}. \quad [7.11]$$

Using these  $\{g_0, g_1, g_2\}$  values along with Eq. [2.11] gives:

$$N(0) \equiv N[t \rightarrow \infty] = c_0 \equiv \{608,013\}, \quad [7.12]$$

as a new predicted total number of CoVID-19 cases at the pandemic end. It is a  $\sim 15.18\%$  or 80,138 increase in number of cases, compared to the *Initial Model*  $N_{\max}^o$  value of Eq. [7.3a].

A graph of  $\rho[t]$  for the predicted number of daily new CoVID-19 cases is shown in **Figure 11**, using Eqs. [2.4b] and [2.5b]. For this fast pandemic shutoff case, the *OFM* improvement over the *Initial Model* is not large. When the initial  $[\exp(-Z)]$  function is not a good fit, which is likely for quicker pandemic shutoffs, a lot of terms, beyond the  $M_F = 2$  value used here, are needed in Eq. [2.5a] for a good fit. An alternative method for choosing the initial  $[\exp(-Z)]$  function is examined next, to see if additional improvements result for that case.

## 8 Italy: An Alternative Starting Function

There is a wide latitude in the choice of an initial  $[\exp(-Z)]$  function for the Eqs. [2.5a]-[2.5b] orthogonal function expansions. However, when the *Initial Model* is not a good fit, the common practice of minimizing *rms* error using a logarithmic Y-axis for the *Initial Model* may not be optimal, since the *Orthogonal Function Model [OFM]* creates best fits using a linear Y-axis.

Minimizing the *rms* error between the *Initial Model* and data using a linear Y-axis is done to provide an alternative  $[\exp(-Z)]$  function. This alternative starting point gives these parameter values, replacing Eqs. [7.2b]-[7.2c]:

$$K_o^L = \{1.1863559 / \text{day}\}, \quad [8.1a]$$

$$\alpha_S^L = \{0.15220 / \text{day}\}. \quad [8.1b]$$

The  $N(t_I) = N_I$  and  $N(t_F) = N_F$  values are still needed to properly set the above  $\{K_A^L, \gamma_o^L\}$  values for  $Z[t]$ . Using Eq. [3.3b] for  $t_I$  and  $t_F$  gives:

$$N[t \rightarrow \infty] \approx N_I \exp[+K_o^L / \alpha_S^L] = N_{\max}^L \equiv \{364,161\}, \quad [8.2a]$$

$$t_I^L = \ln(N_I) / [K_o^L + \alpha_S^L \ln(N_I)] = \{2.570908 \text{ days}\}, \quad [8.2b]$$

$$t_F^L = t_I^L + \{113 \text{ days}\} = \{115.570908 \text{ days}\}, \quad [8.2c]$$

for use in the *OFM*, while still using this linear Y-axis initial fit. **Figure 12** and its inset show how this alternative *Initial Model* compares to the Italy CoVID-19 data. Using Eqs. [3.5a]-[3.5b] sets these new  $\{\gamma_o^L, K_A^L, G_0^L\}$  values:

$$\gamma_o^L = \{0.2500379 / \text{day}\}, \quad [8.3a]$$

$$K_A^L = \{3.2018233 / \text{day}\}, \quad [8.3b]$$

$$G_0^L \equiv [K_A^L / \gamma_o^L] = \{12.8053524\}, \quad [8.3c]$$

where Eq. [3.1c] also gives:



$$\lim_{t \rightarrow \infty} \{ \mathbf{1} \exp[\frac{+K_o^L t}{(1+\gamma_o^L t)}] \} = \mathbf{1} \exp[\frac{K_o^L}{\gamma_o^L}] = N_{\max}^L \equiv \{364, 161\}, \quad [8.4]$$

which matches Eq. [8.2a], as it should. Then:

$$Z^L[t] = +[G_o^L / (1 + \gamma_o^L t)] = [12.8053524 / (1 + 0.2500379 t)], \quad [8.5]$$

defines  $Z^L$  for this alternative fit analysis, where:

$$Z_{\min}^L[t_F^L \approx 115.5709] = +[G_o^L / (1 + \gamma_o^L t_F^L)] = 0.428314107, \quad [8.6a]$$

$$Z_{\max}^L[t_I^L \approx 2.5709] = +[G_o^L / (1 + \gamma_o^L t_I^L)] = 7.79471714. \quad [8.6b]$$

The resultant symmetric matrix  $\underline{\mathbf{M}}_3$  of  $K_{m,n}$  entries is:

$$\underline{\mathbf{M}}_3 = \begin{pmatrix} K_{0,0} & K_{0,1} & K_{0,2} \\ K_{1,0} & K_{1,1} & K_{1,2} \\ K_{2,0} & K_{2,2} & K_{2,2} \end{pmatrix} = \begin{pmatrix} +.6511948 & -.2758817 & -.2286253 \\ -.2758817 & +.7457076 & -.1094322 \\ -.2286253 & -.1094322 & +.6094403 \end{pmatrix}. \quad [8.7]$$

It has an  $(\underline{\mathbf{M}}_3)$  inverse of:

$$(\underline{\mathbf{M}}_3)^{-1} \equiv \begin{pmatrix} 2.3414686 & 1.0220827 & 1.0619049 \\ 1.0220827 & 1.8234538 & 0.71084659 \\ 1.0619049 & 0.71084659 & 2.1668535 \end{pmatrix}. \quad [8.8]$$

A convolution of  $L_m(Z^L)$  functions with the measured data sets  $\vec{Q}_3$  using Eqs. [4.11a]-[4.11b], with  $(\underline{\mathbf{M}}_3)^{-1}$  of Eq. [4.5c] giving this final  $\vec{g}$ -vector:

$$\begin{aligned} (\underline{\mathbf{M}}_3)^{-1} \vec{Q}_3 &\equiv (\underline{\mathbf{M}}_3)^{-1} \begin{pmatrix} Q_o \\ Q_1 \\ Q_2 \end{pmatrix} = (\underline{\mathbf{M}}_3)^{-1} \begin{pmatrix} +188,281 \\ -10,274 \\ -61,526 \end{pmatrix} \equiv \\ \vec{g}_3 &= \begin{pmatrix} g_o \\ g_1 \\ g_2 \end{pmatrix} = \begin{pmatrix} 365,018 \\ 129,969 \\ 59,315 \end{pmatrix}. \end{aligned} \quad [8.9]$$

The coefficients for  $R(Z)$ , which set the predicted number of daily new CoVID-19 cases for the *OFM*, are given by:

$$\vec{C}_3 = \begin{pmatrix} 1 & 1 & 1 \\ 0 & 1 & 1 \\ 0 & 0 & 1 \end{pmatrix} \vec{g}_3 = \begin{pmatrix} c_0 \\ c_1 \\ c_2 \end{pmatrix} = \begin{pmatrix} +554,303 \\ 189,284 \\ 59,315 \end{pmatrix}. \quad [8.10]$$

Using these  $\{g_0, g_1, g_2\}$  values along with Eq. [2.11] gives:

$$N(0) \equiv N[t \rightarrow \infty] = c_0 \equiv \{554,303\}, \quad [8.11]$$

as a new predicted total number of CoVID-19 cases at the pandemic end.

It is a ~5.00% or 26,428 increase in number of cases, compared to the *Initial Model*  $N_{\max}^o$  value of Eq. [7.3a]. A graph of  $\rho[t]$  for the predicted number of daily new CoVID-19 cases is shown in **Figure 13**, using Eqs. [2.4b] and [2.5b].

A tabulated summary for all of these Italy calculations is:

| Parameter                 | <i>Initial Model</i> | <i>Orthog. Func.</i> | <i>Init. Model Re-do</i> | <i>Orthog. Func. Re-do</i> |
|---------------------------|----------------------|----------------------|--------------------------|----------------------------|
| $N[t \rightarrow \infty]$ | 527,875              | 608,013              | 364,161                  | 554,303                    |
| $\max\{\rho[t_p]\}$       | 2,860 / day          | 3,886 / day          | 3,848 / day              | 4,073 / day                |
| $[t_p]$ Date              | 4/2/2020             | 3/29/2020            | 3/14/2020                | 3/26/2020                  |

The *Initial Model* shapes for  $\rho[t]$  were very different, depending on whether that initial datafit was performed by minimizing *rms* error using a logarithmic Y-axis (**Figure 10**) or a linear Y-axis (**Figure 12**, *Initial Model Re-do*) as expected. However, comparing the two *OFM* (**Figure 11** vs **Figure 13**) calculations, shows that their overall  $\rho[t]$  shapes are quite similar.

While the  $\max\{\rho[t_p]\}$  calculated pandemic peaks generally increase, they are all below the data near-peak values of  $\sim 4,800 - 6,500$  cases/day shown in **Figs. 10-13**. Thus, for quick pandemic shutoffs, the *Initial Model*  $[\exp(-Z)]$  function is less important than needing more  $M_F$  terms. When the *Initial Model* is not a good fit, the *OFM* only gives limited improvements for  $M_F = 2$ .

## 9 Summary and Conclusions

The early stages of the CoVID-19 coronavirus pandemic began with a nearly exponential rise in the number of infections with time. Let  $N[t]$  be the total number of CoVID-19 cases vs time. Our *Initial Model*<sup>2</sup> used this basic function:

$$N[t] \approx \mathbf{1} \exp[+K_A t / (1 + \gamma_o t)] = \exp[+G_o] \exp[-Z], \quad [9.1a]$$

$$Z[t] \equiv +[G_o / (1 + \gamma_o t)], \quad G_o \equiv [K_A / \gamma_o], \quad [9.1b]$$

to model *Social Distancing* effects by progressively lengthening the *doubling time* for the pandemic growth. The  $\gamma_o = 0$  limit of Eq. [9.1a] corresponds to a purely exponential rise. This *Initial Model* enables calculation of a pandemic shutoff with only a small fraction of the total population becoming infected ("*dilute pandemic*").

To allow more data fitting parameters than just  $\{K_A, \gamma_o\}$ , an *Orthogonal Function Model [OFM]* was developed, using these orthogonal function series:

$$N(Z) = \sum_{m=0}^{m=M_F} g_m L_m(Z) \exp[-Z], \quad [9.2a]$$

$$R(Z) = \sum_{m=0}^{m=M_F} c_m L_m(Z) \exp[-Z], \quad [9.2b]$$

$$c_{M_F-k} = \sum_{m=0}^{m=k} g_m, \quad [9.2c]$$

where  $N[t] = N(Z[t])$ . The  $\{g_m; m = (0, +M_F)\}$  are a set of constants that are determined from each dataset. Using  $\exp[-Z]$  as a weighting function, with  $L_m(Z)$  as an orthonormal function set on the  $Z = \{0^+, \infty^-\}$  interval, the choice of  $L_m(Z)$  becomes unique. They are the *Laguerre Polynomials*, with several important properties given in Eqs. [2.6a]-[2.7e].

The expected number of daily new CoVID-19 cases,  $\rho[t]$ , is given by:

$$N[t] \equiv \int_{t'=(-1/\gamma_o)}^{t'=t} \rho[t'] dt', \quad [9.3a]$$

$$\rho[t] \equiv (\gamma_o / G_o) Z^2 R(Z). \quad [9.3b]$$

For a wide range of  $N(Z)$  data, larger  $M_F$  and more  $\{L_m(Z); m = (0, +M_F)\}$  terms gives progressively better matches to almost any *arbitrary function*, enabling improved data fitting for a variety of  $N[t]$  and  $\rho[t]$  shapes.

Methods are developed here to derive  $\{K_A, \gamma_o\}$ , and determine the  $\{g_m; m = (0, +M_F)\}$  and  $\{c_m; m = (0, +M_F)\}$  constants from any given  $N[t]$  dataset. Whereas our *Initial Model* was an  $M_F = 0$  case, the  $M_F = 2$  case was used here for data analysis, as an *OFM* example.

These methods were applied to the CoVID-19 pandemic data for the USA. Analysis results using the original *bing.com* up data to  $\sim 5/3/2020$  are given in

**Figures 2-5** and Eq. [5.13]. During early-May, *bing.com* revised their entire database, all the way back to their earliest values. This revised USA *bing.com* data, which included an extended time period into June 2020, was also analyzed, with results given in **Figures 6-9** and Eq. [6.11].

For the USA, the *Initial Model* and *OFM* results differed by only  $\sim 10\%$ , showing that the *Initial Model* was a somewhat good fit, while the *OFM* is a better fit. Comparing our calculations using the 43-day 5/3/2020 original *bing.com* dataset to the 78-day 6/7/2020 revised *bing.com* dataset, showed that our early-May USA projections predicted the June data to within  $\lesssim 10\%$  for the same model. Thus, both models provided self-consistent CoVID-19 projections, holding their predictive power for over a month {43 days vs. 78 days}, without recalculations or parameter value changes.

The Italy CoVID-19 pandemic data was studied next, as a worst-case test of the *OFM*. The post-May 2020 revised *bing.com* database was used, with results presented in **Figures 10-13**. Italy had a much sharper CoVID-19 pandemic shutoff for  $\rho[t]$  compared to the USA. While the *OFM* can give substantial improvements, here  $M_F = 2$  does not provide enough extra parameters, to convert an *Initial Model* result that was not a good fit, into a substantially better fit. A larger  $M_F$  and additional orthogonal function terms are needed.

Even then, the long-term tail can be inaccurate, since both the *Initial Model* and the *OFM* extension have natural  $\rho[t]$  asymptotic limits of  $\rho[t] \sim [1/t^2]$ . Larger  $M_F$  values could allow multiple terms to cancel, but a polynomial-like tail of  $\rho[t] \sim [1/t^P]$ , with  $P \geq 2$ , would likely remain, making it difficult to estimate the functional form of the CoVID-19 tail for quick pandemic shutoffs.

Overall, both the *Initial Model* and this *Orthogonal Function Model* show how progressively lengthening the pandemic *doubling time* enables CoVID-19 pandemic shutoff, even in the *dilute pandemic* limit. However, there may a natural limit to how fast this one mitigation factor can achieve pandemic shutoff. For cases like Italy, other *Social Distancing* factors may be operating that enable and enhance quick CoVID-19 pandemic shutoff, which are **not** effectively being modeled by just lengthening the pandemic *doubling times*.

## 10 List of Figures

**Figure 1:** Comparison of IHME CoVID-19 Projections, 29 April 2020 vs 4 May 2020. CDC CoVID-19 Website highlighted IHME Projections prior to the IHME May 2020 update.

**Figure 2:** *Initial Model* for USA CoVID-19 Projections using data up to 5/3/2020. Predicted Number of Daily CoVID-19 Cases has a peak of 31,760 cases/day on 4/17; with 5,024,900 cases total; and  $\sim 6,757$  new cases/day at Day 200 on 9/26/2020.

**Figure 3:** *Initial Model* for USA CoVID-19 Projections vs data up to 5/3/2020. Original *bing.com* data up to 5/3/2020 are shown, prior to their *new reporting method*. Data starts slightly below, then goes slightly above the *Initial Model* prediction line.

**Figure 4:** *Orthogonal Function Model*, USA CoVID-19 Projections, data to 5/3/2020. Predicted Number of Daily CoVID-19 Cases has a peak of 32,069 cases/day on 4/15; with 4,645,874 cases total; and  $\sim$ 5,962 new cases/day at Day 200 on 9/26/2020.

**Figure 5:** *Orthogonal Function Model*, USA CoVID-19 Projections, data to 5/3/2020. Original *bing.com* data up to 5/3/2020 are shown, prior to their *new reporting method*. *Orthogonal Function Model* matches data a bit better than the *Initial Model*.

**Figure 6:** *Initial Model* for USA CoVID-19 Projections vs data up to 6/7/2020. Predicted Number of Daily CoVID-19 Cases has a peak of 30,727 cases/day on 4/15; with 4,499,494 cases total; and  $\sim$ 5,783 new cases/day at Day 200 on 9/27/2020.

**Figure 7:** *Initial Model* for USA CoVID-19 Projections vs data up to 6/7/2020. Revised *bing.com* data, circa 5/3/2020, changed all values back to the pandemic start. *Initial Model* appears to be a good datafit by itself.

**Figure 8:** *Orthogonal Function Model*, USA CoVID-19 Projections, data to 6/7/2020. Revised *bing.com* data; daily# of CoVID-19 Cases Peak at 30,909 cases/day on 4/13/2020; with 4,179,205 cases total; and  $\sim$ 5,140 new cases/day at Day 200 on 9/27/2020.

**Figure 9:** *Orthogonal Function Model*, USA CoVID-19 Projections, data to 6/7/2020. Revised *bing.com* data, posted circa 5/3/2020, changed values back to the pandemic start. *Orthogonal Function Model* matches the data a bit better than the *Initial Model*.

**Figure 10:** *Initial Model* for Italy CoVID-19 Projections vs data up to 6/15/2020. *Initial Model* matches Total Number of Cases at data start and data end, but best fit using a logarithmic Y-axis does not give a good fit for Predicted Number of Daily CoVID-19 cases.

**Figure 11:** *Orthogonal Function Model* for Italy CoVID-19 data up to 6/15/2020. *Orthogonal Function Model* gives improved datafit, but 3-terms in orthogonal function series is insufficient to accurately predict a rapidly decreasing Number of Daily CoVID-19 cases.

**Figure 12:** *Initial Model* re-do, Italy CoVID-19 data to 6/15/2020. New starting point is a best fit function on a linear Y-axis, instead of having a best fit using a logarithmic Y-axis. Alternative method may allow a few-term orthogonal function series to better match the data.

**Figure 13:** *Orthogonal Function Model* re-do, Italy CoVID-19 data to 6/15/2020. *Orthogonal Function Model* re-do gives a slightly better small-series fit. Other *Social Distancing* impacts likely exist besides just lengthening pandemic *doubling times*.

## 11 References

1. <https://www.MedRxiv.org/> ID=MedRxiv/2020/043752v1, 03.25.2020, "Forecasting COVID-19 impact on hospital bed-days, ICU-days, ventilator-days and deaths by US state in the next 4 months",

- IHME COVID-19 Health Service Utilization Forecasting Team.
2. <https://www.MedRxiv.org/content/10.1101/2020.05.04.20091207v1>, <https://doi.org/10.1101/2020.05.04.20091207>, "Initial Model for the Impact of Social Distancing on CoVID-19 Spread", Genghmun Eng
  3. <https://www.geekwire.com/2020/univ-washington-epidemiologists-predict-80000-covid-19-deaths-u-s-july>, "Univ. of Washington researchers predict 80,000 COVID-19 deaths in U.S. by July", Alan Boyle, *GeekWire*, March 26, 2020.
  4. <https://www.yahoo.com/finance/news/coronavirus-modelers-raise-projected-u-041641553.html>, "Coronavirus modelers raise projected U.S. death toll and lengthen state-by-state recovery timeline", Alan Boyle, *GeekWire*, April 27, 2020.
  5. <https://finance.yahoo.com/news/pandemic-projection-puts-u-death-220824741.html>, "New pandemic projection puts U.S. death toll at nearly 135,000, due to less social distancing", Alan Boyle, *GeekWire*, May 4, 2020.
  6. <http://www.healthdata.org/covid/updates> "COVID-19: What's New for May 4, 2020: Updated IHME COVID-19 projections: Predicting the Next Phase of the Epidemic", IHME COVID-19 Health Service Utilization Forecasting Team.
  7. G. N. Watson, "A Note of the Polynomials of Hermite and Laguerre", *Journal of the London Mathematical Society*, **13**(1938), pp. 29-32.
  8. J. Gillis and G. Weiss, "Products of Laguerre Polynomials", *Math. Comput.*, **14**(69), Jan. 1960, pp. 60-63
  9. [www.bing.com/covid](http://www.bing.com/covid): 'Bing COVID-19 Tracker', and <https://www.bing.com/covid?form=CPVD07>.

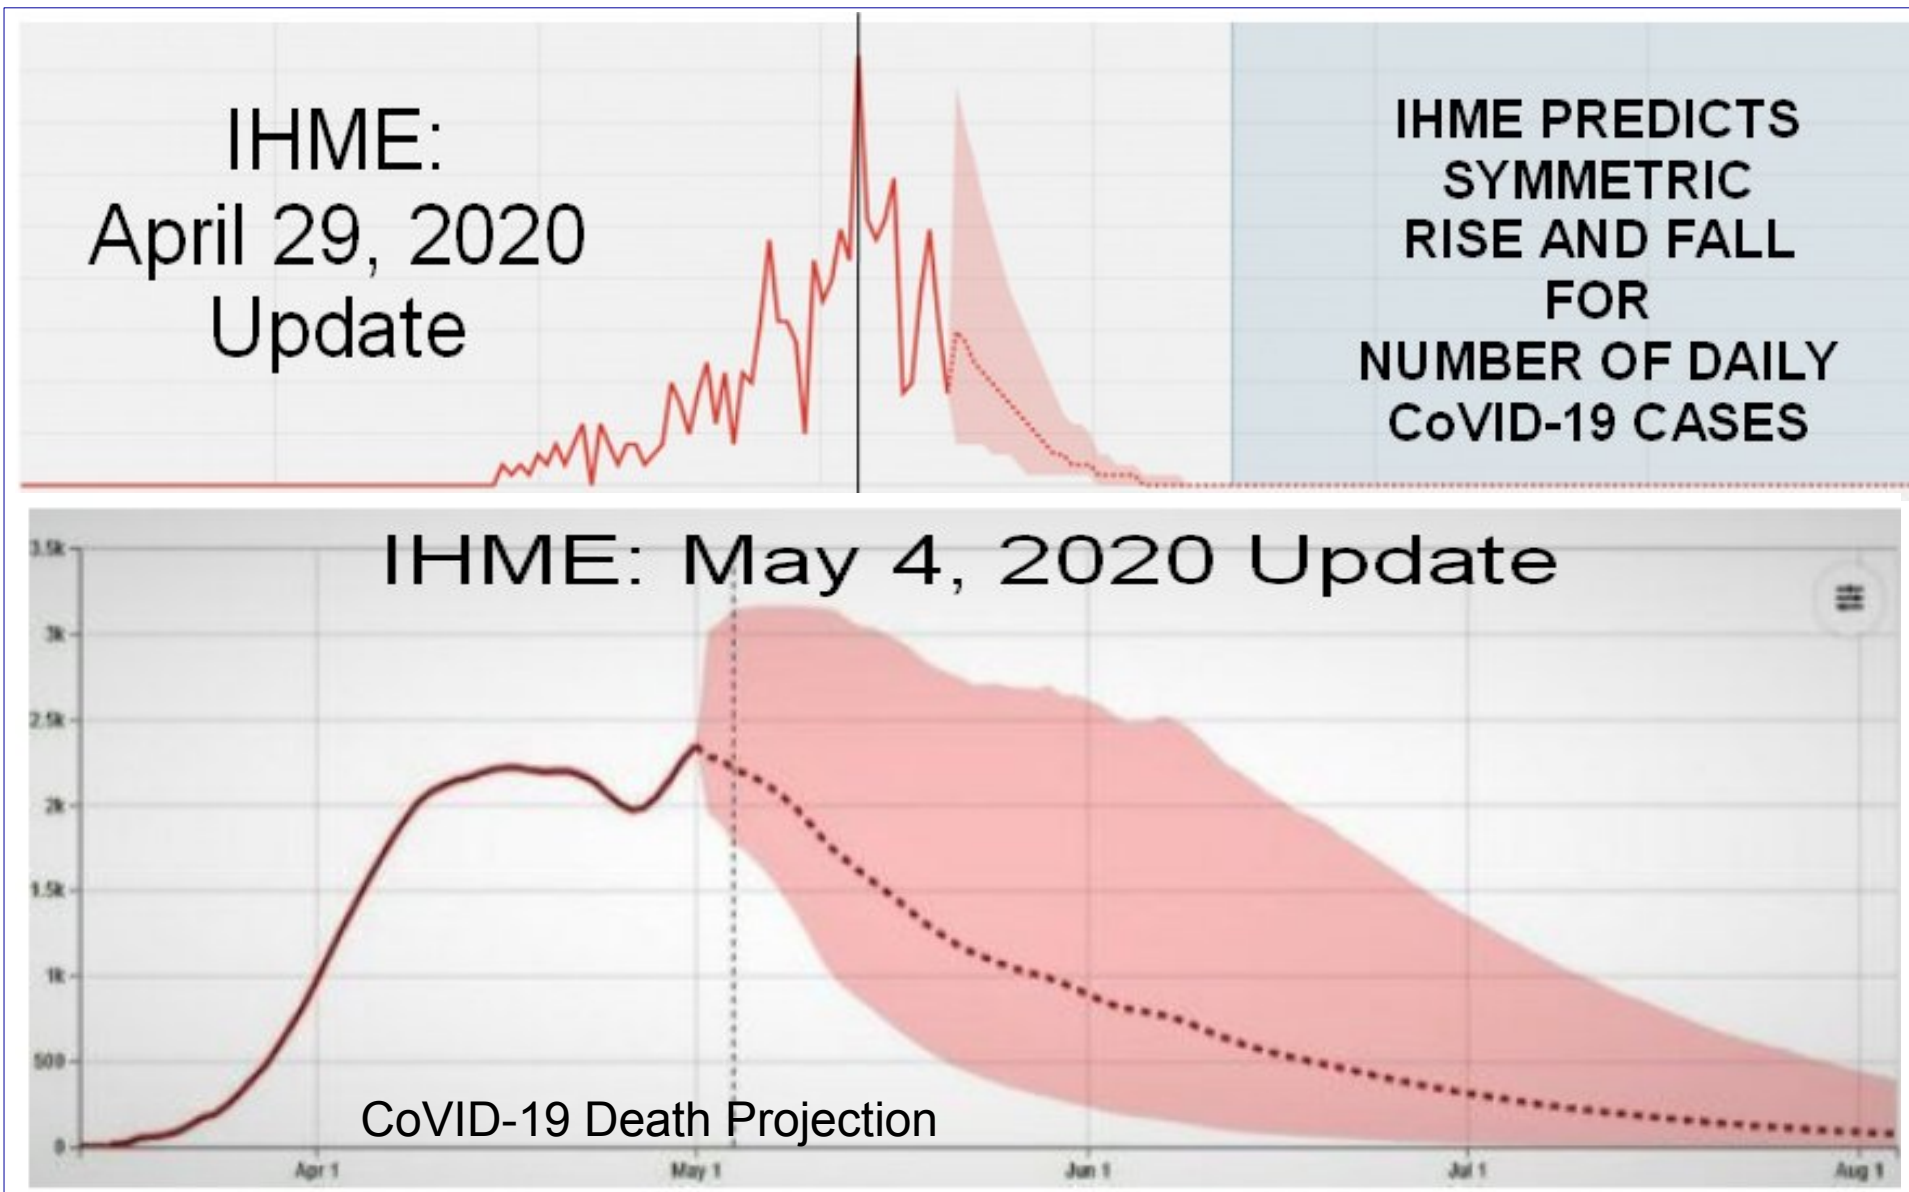

**Figure 1: Comparison of IHME CoVID-19 Projections, 29 April 2020 vs 4 May 2020.** CDC CoVID-19 Website highlighted IHME Projections prior to the IHME May 2020 update.

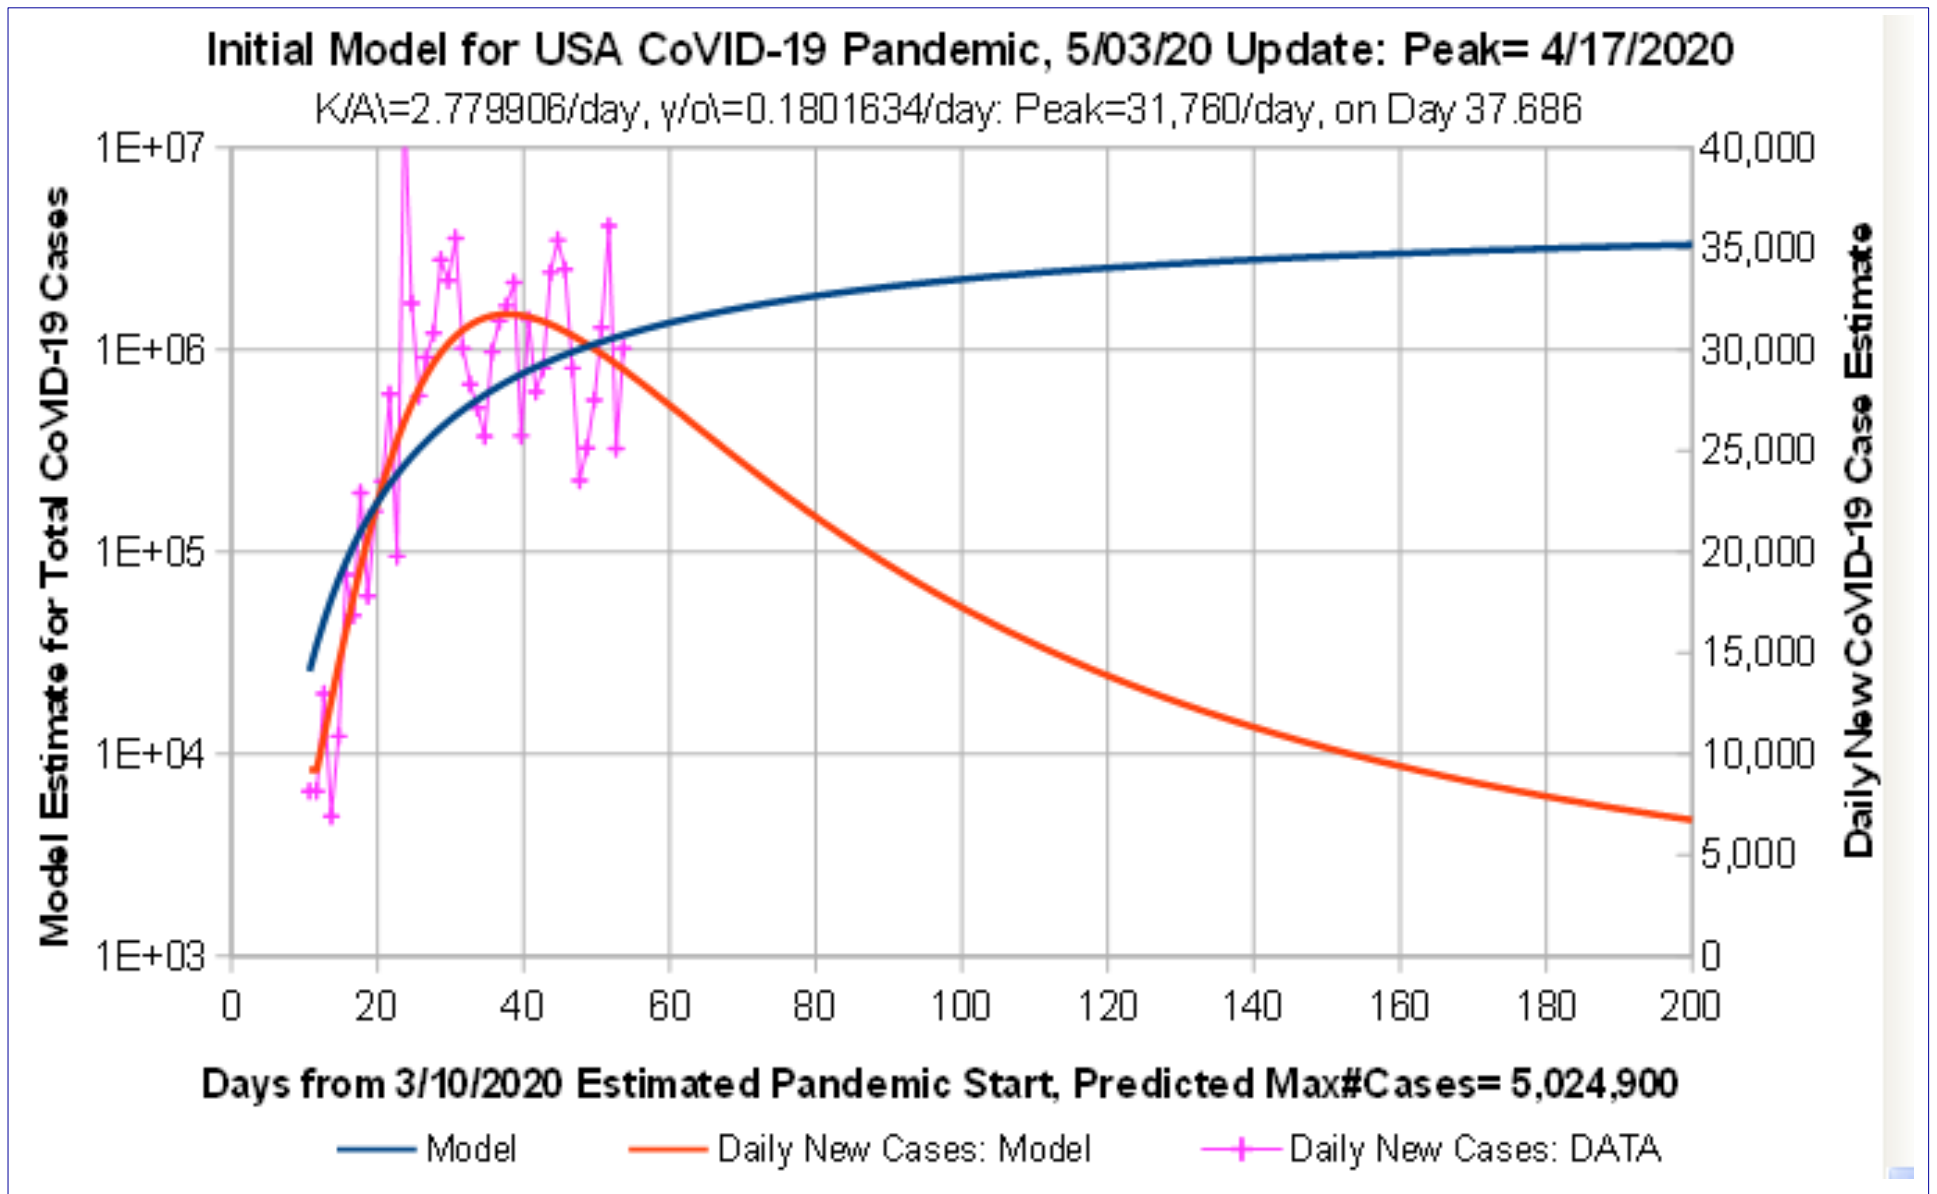

**Figure 2: Initial Model for USA CoVID-19 Projections using data up to 5/3/2020.** Predicted Number of Daily CoVID-19 Cases has a peak of 31,760 cases/day on 4/17; with 5,024,900 cases total; and ~6,757 new cases/day at Day 200 on 9/26/2020.

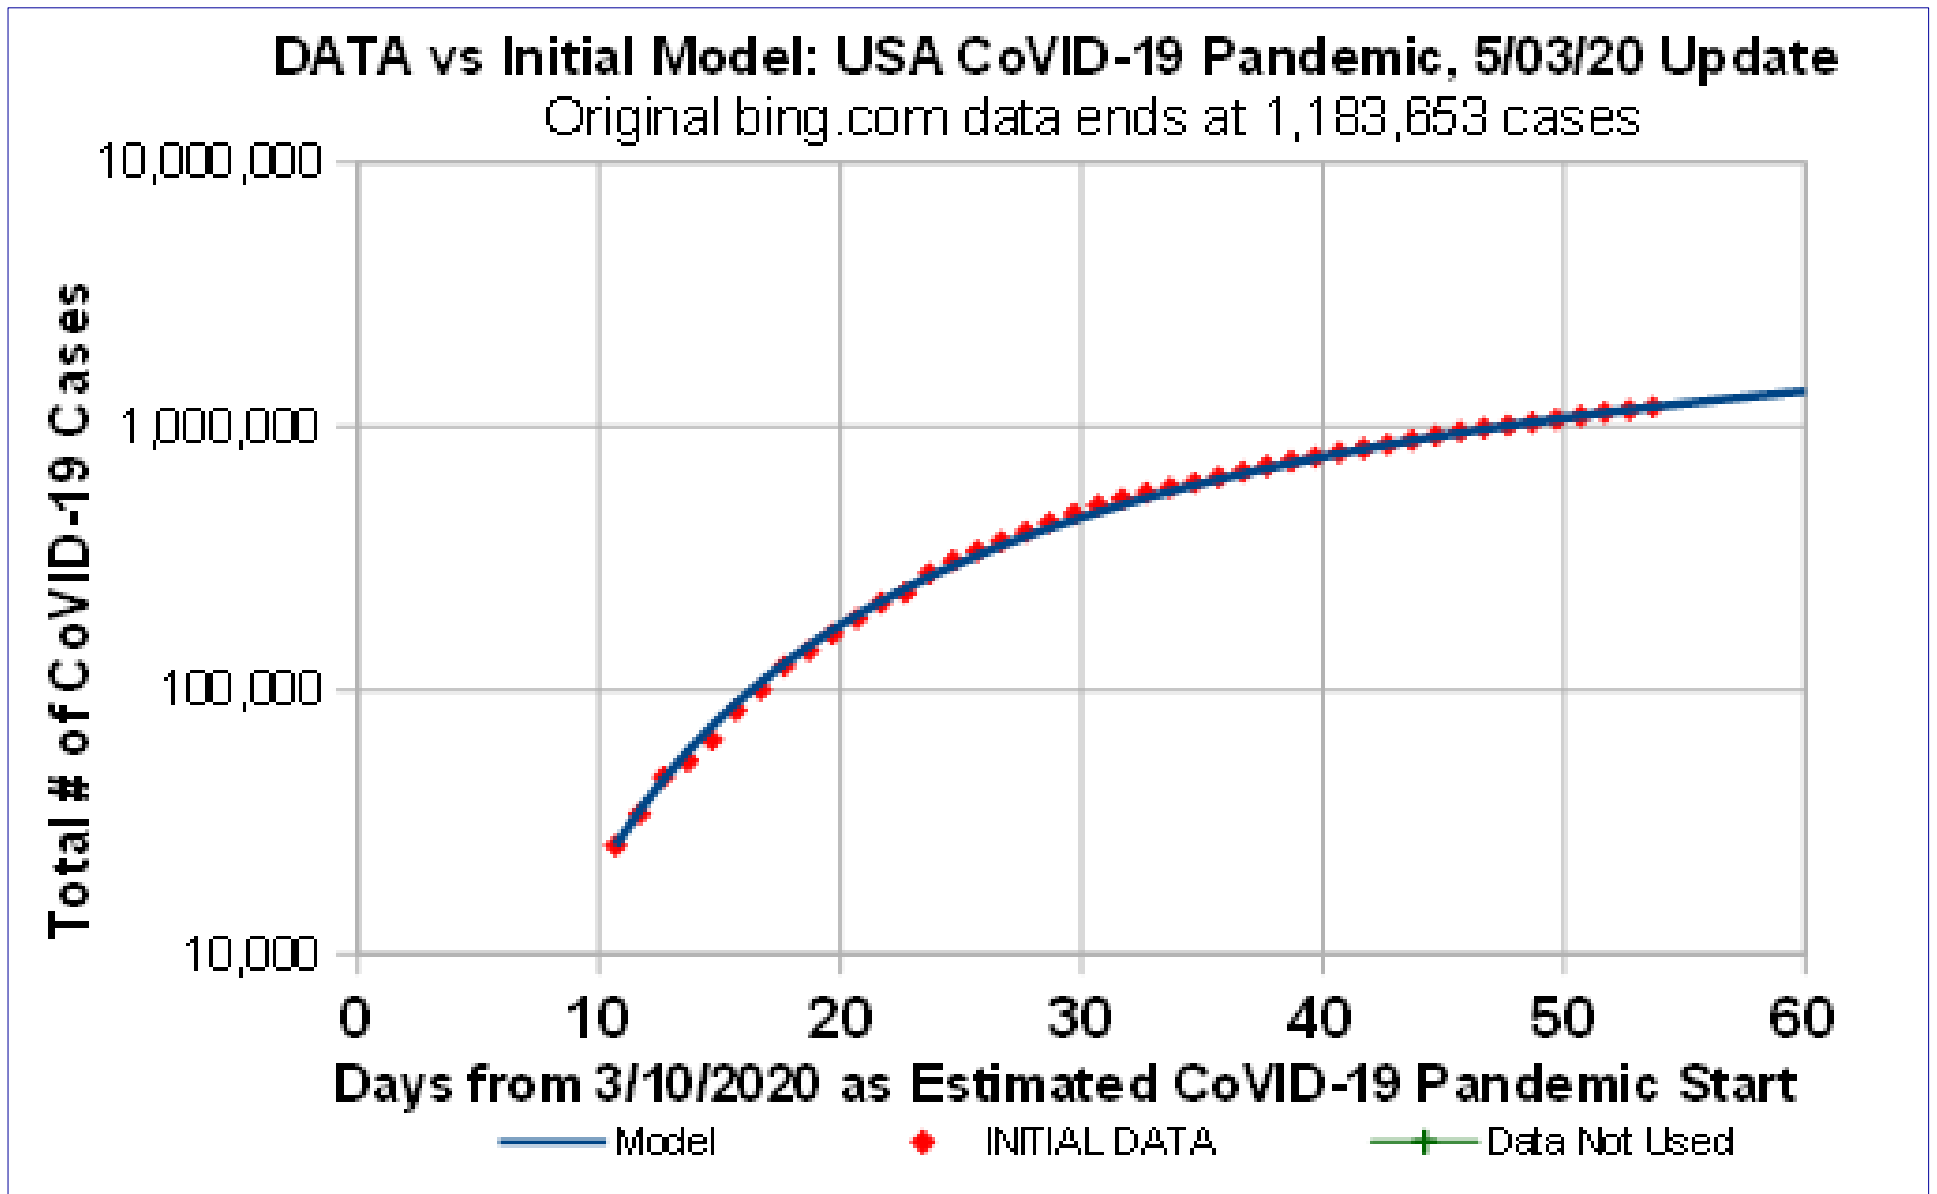

**Figure 3: Initial Model for USA CoVID-19 Projections vs data up to 5/3/2020.** Original *bing.com* data up to 5/3/2020 are shown, prior to their new reporting method. Data starts slightly below, then goes slightly above the Initial Model prediction line.



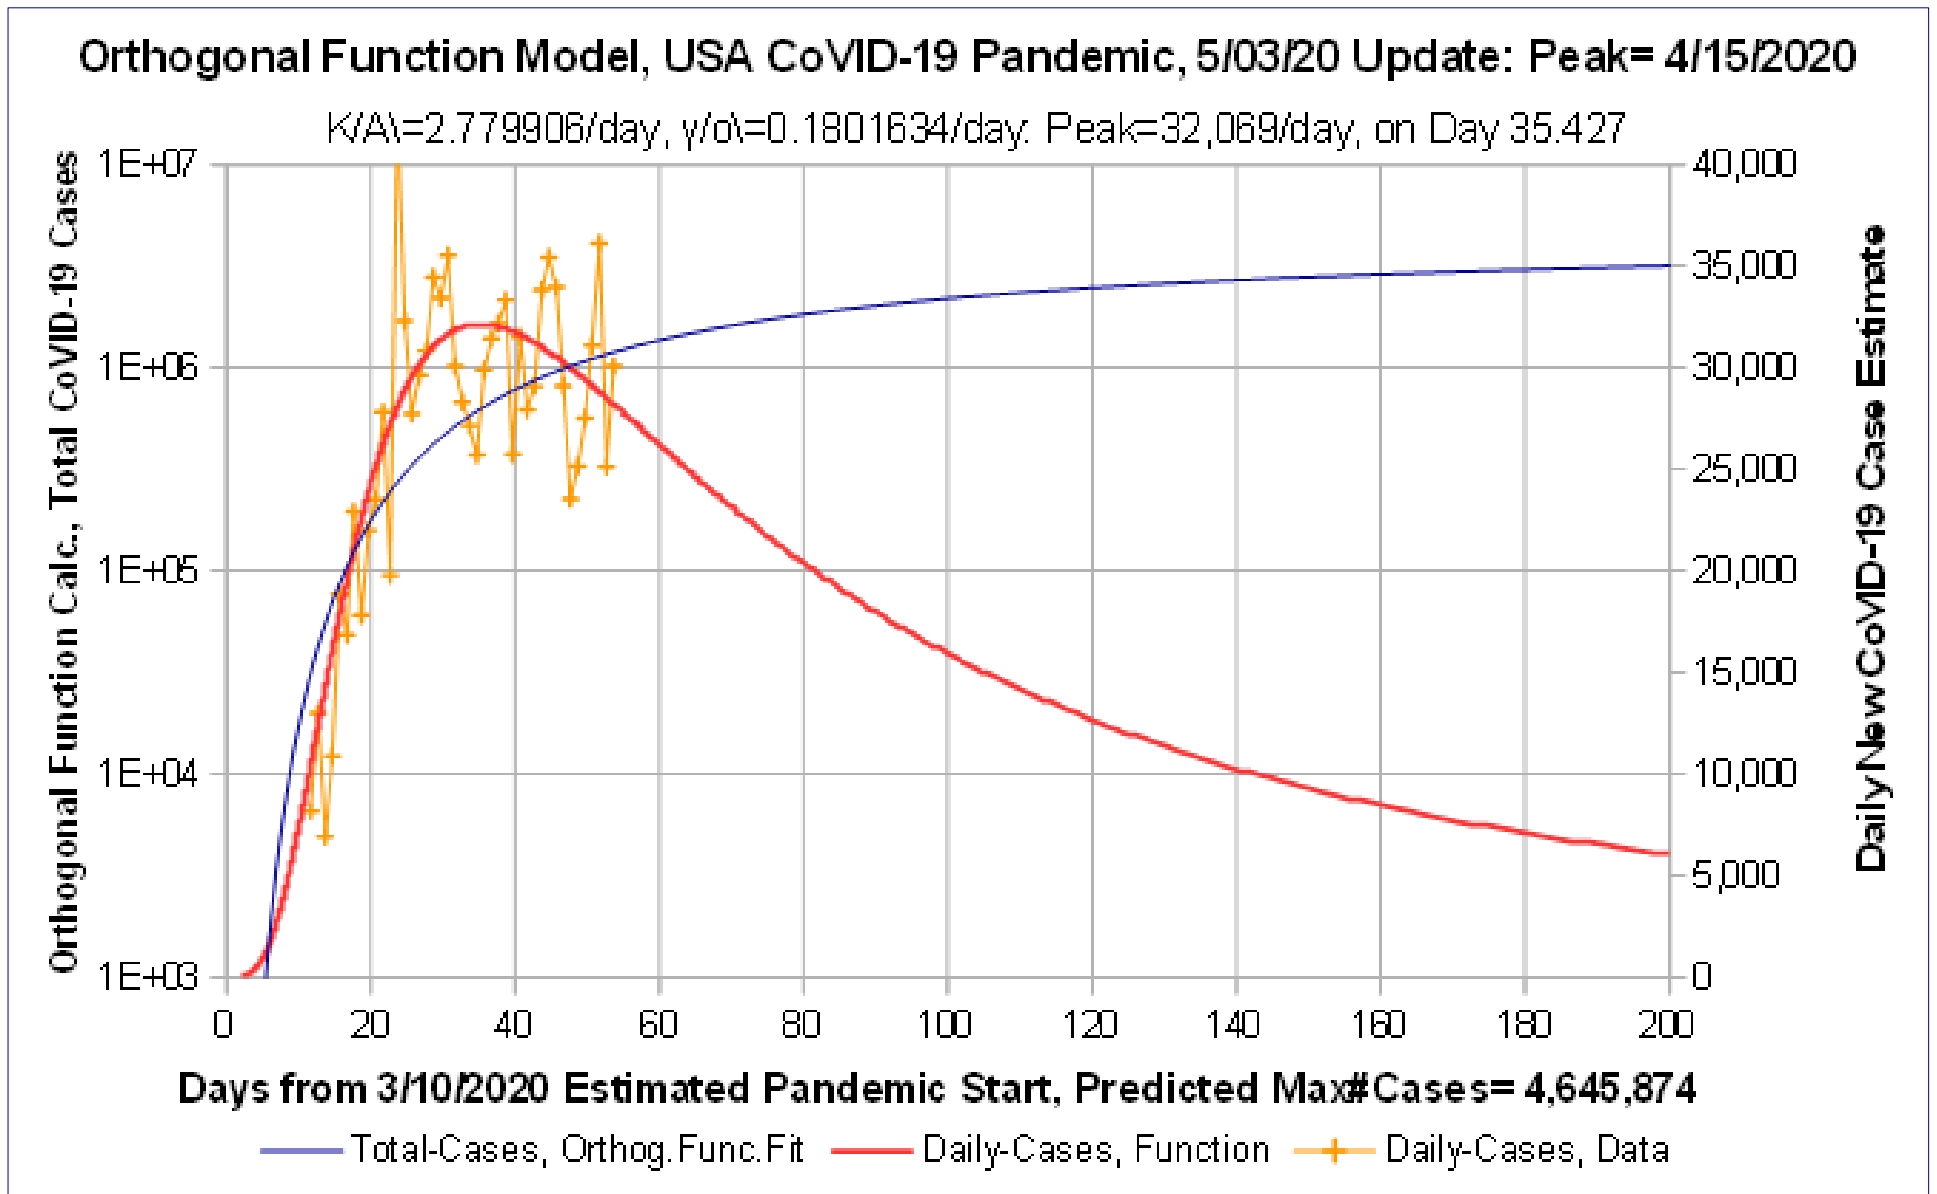

**Figure 4: Orthogonal Function Model, USA CoVID-19 Projections, data to 5/3/2020.** Predicted Number of Daily CoVID-19 Cases has a peak of 32,069 cases/day on 4/15; with 4,645,874 cases total; and ~5,962 new cases/day at Day 200 on 9/26/2020.

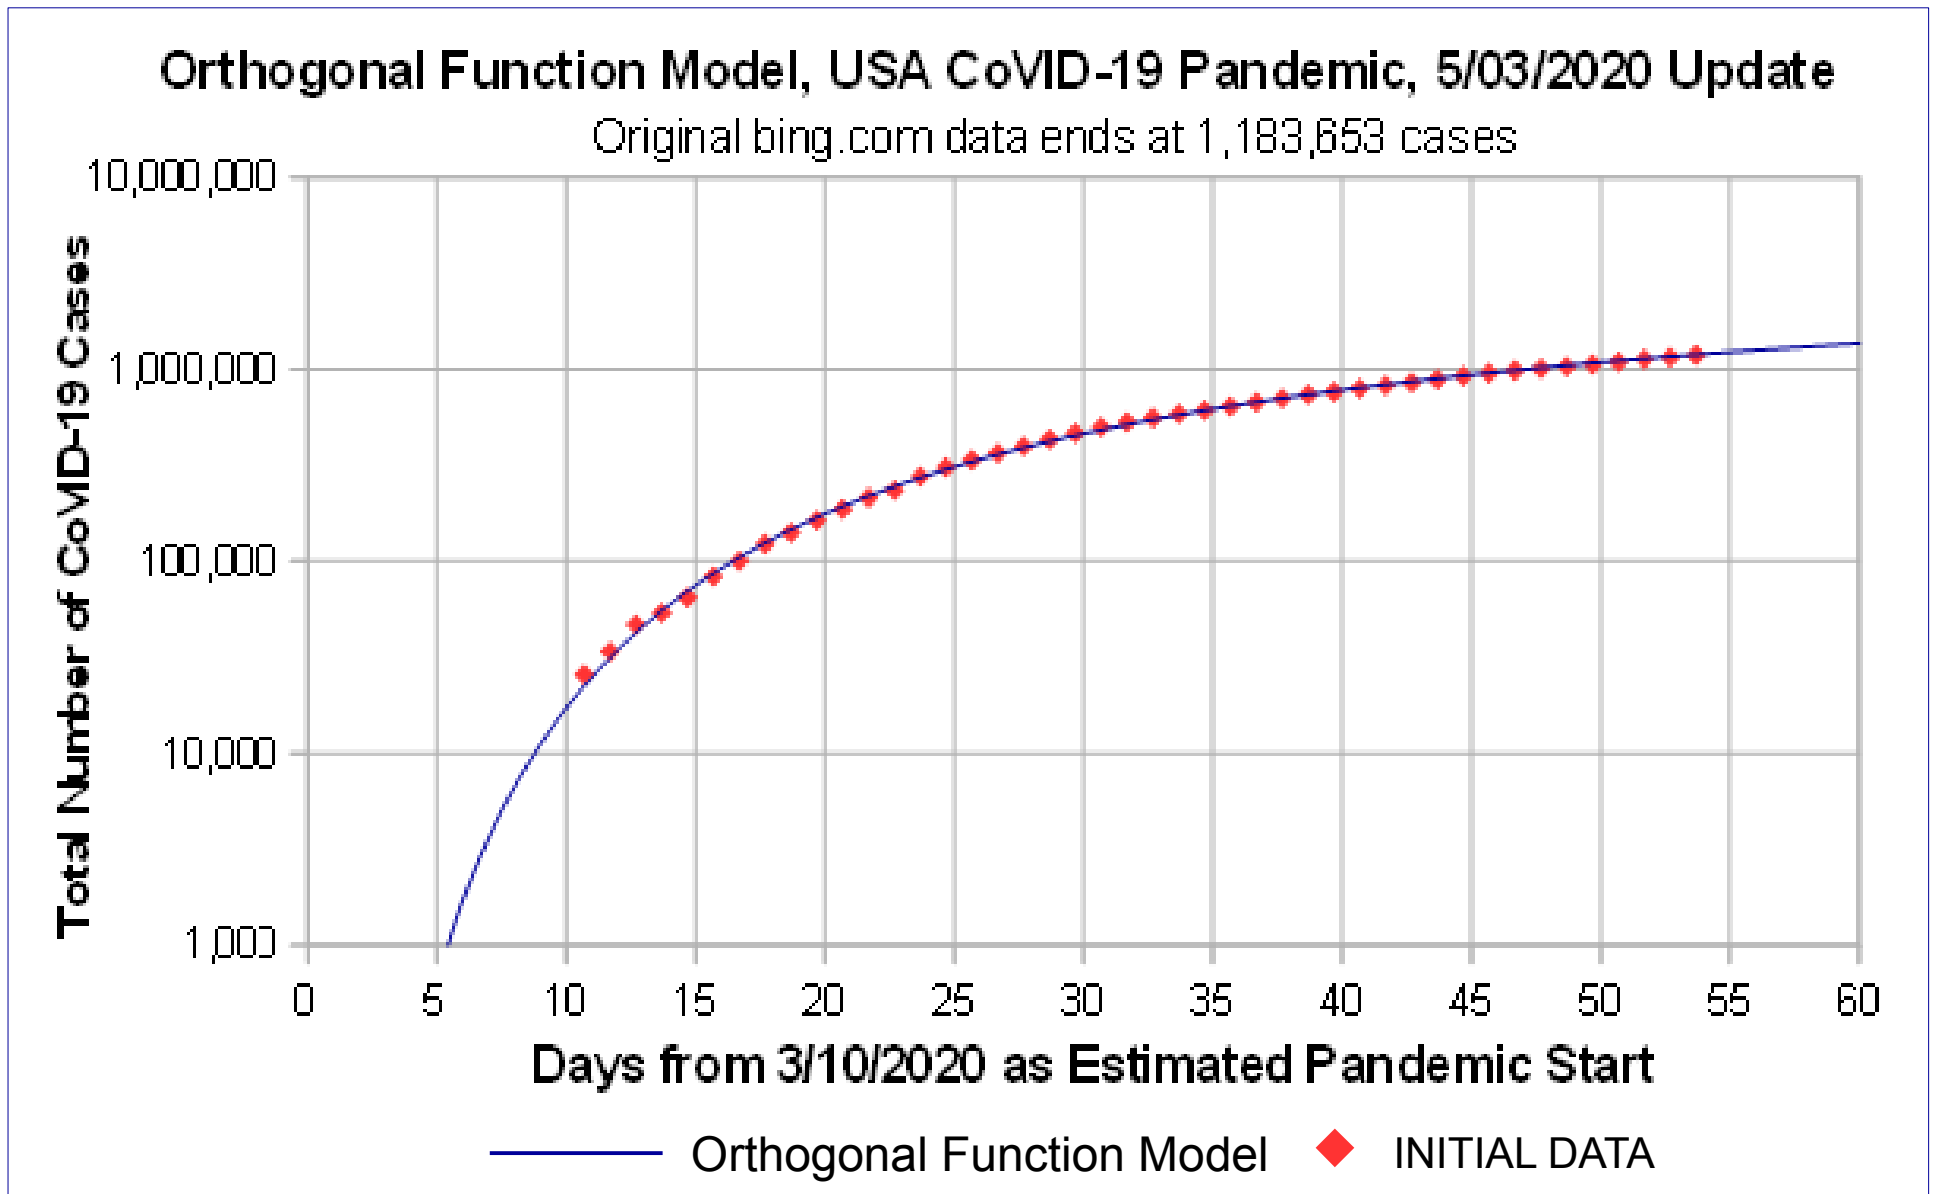

**Figure 5: Orthogonal Function Model, USA CoVID-19 Projections, data to 5/3/2020.** Original *bing.com* data up to 5/3/2020 are shown, prior to their new reporting method. *Orthogonal Function Model* matches data a bit better than the *Initial Model*.

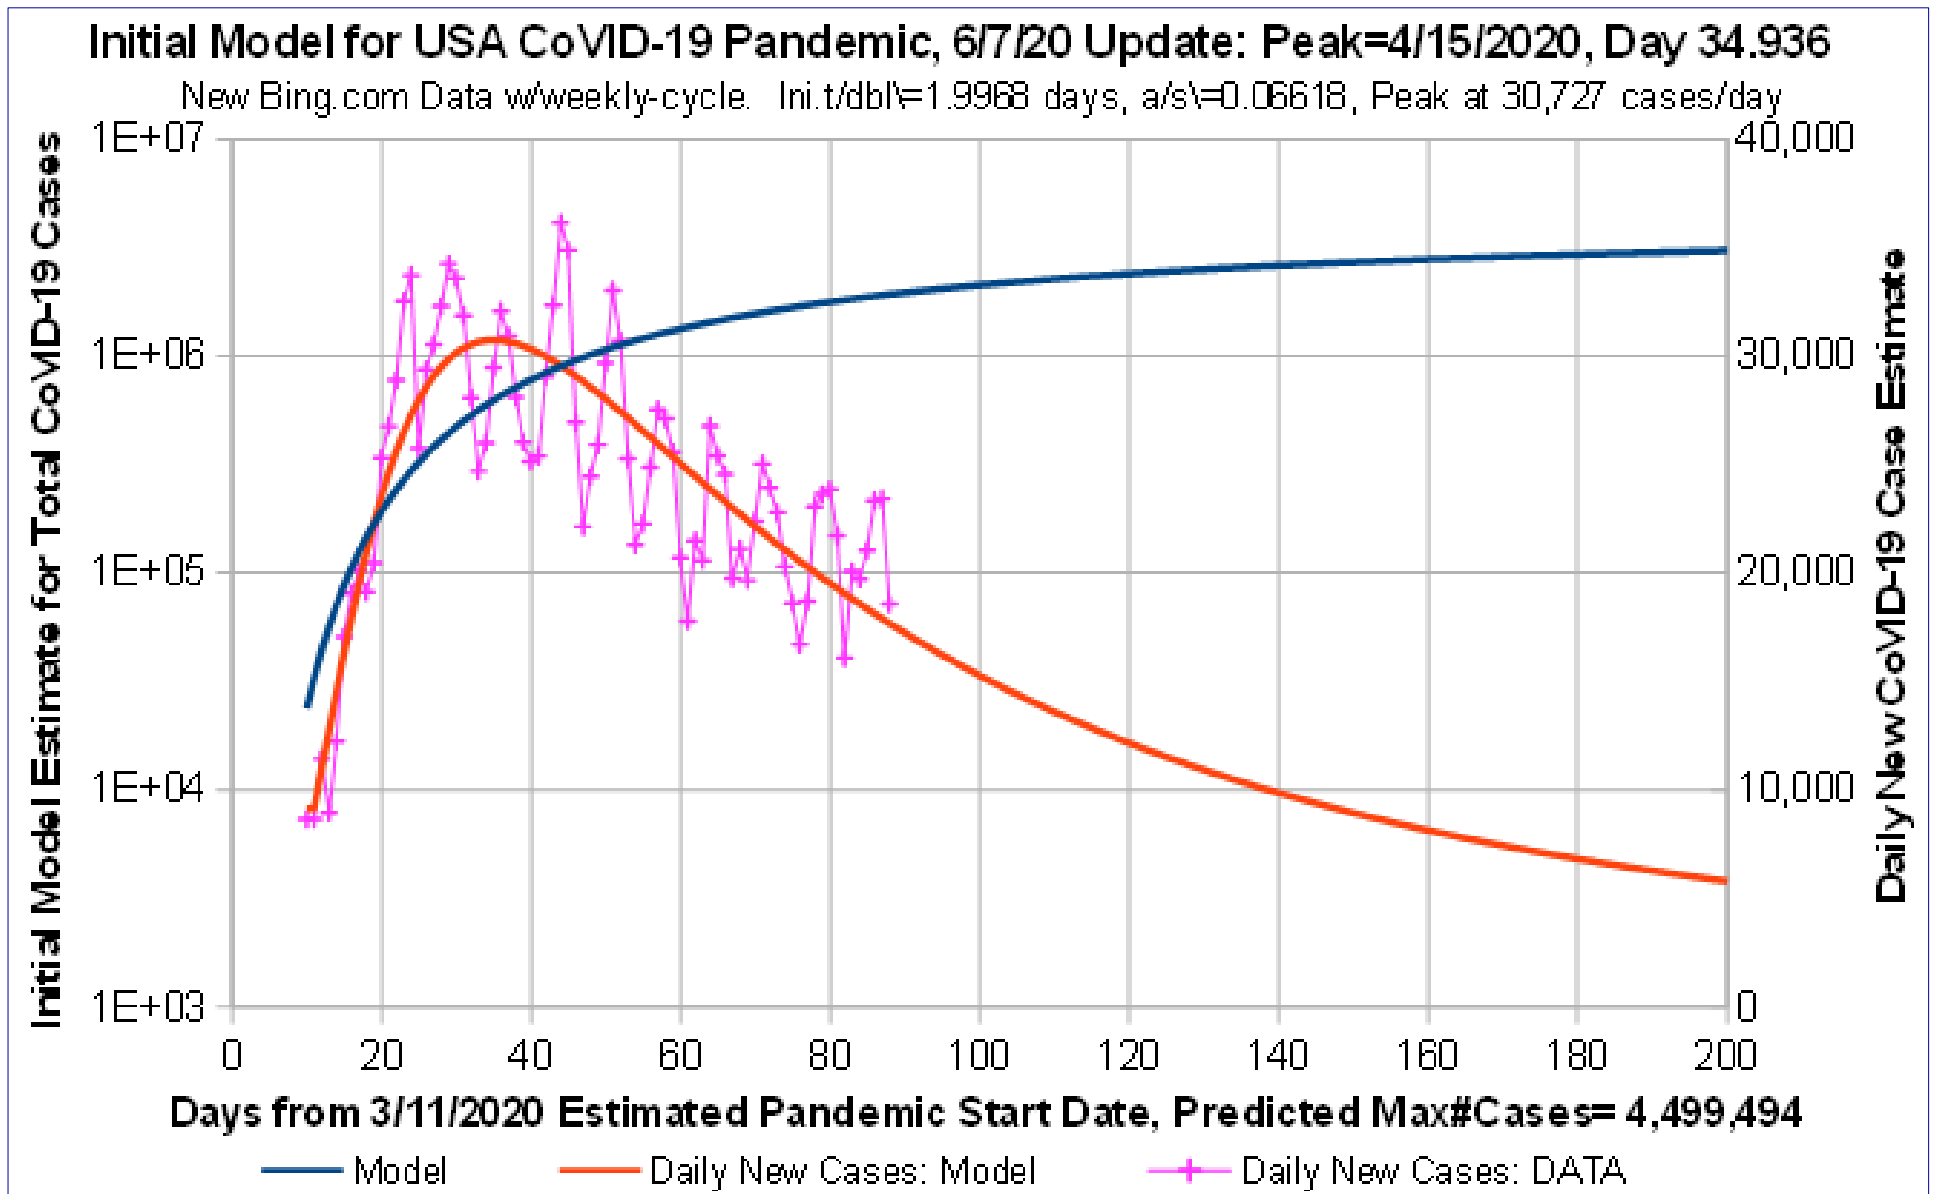

**Figure 6: Initial Model for USA CoVID-19 Projections vs data up to 6/7/2020.** Predicted Number of Daily CoVID-19 Cases has a peak of 30,727 cases/day on 4/15; with 4,499,494 cases total; and ~5,783 new cases/day at Day 200 on 9/27/2020.

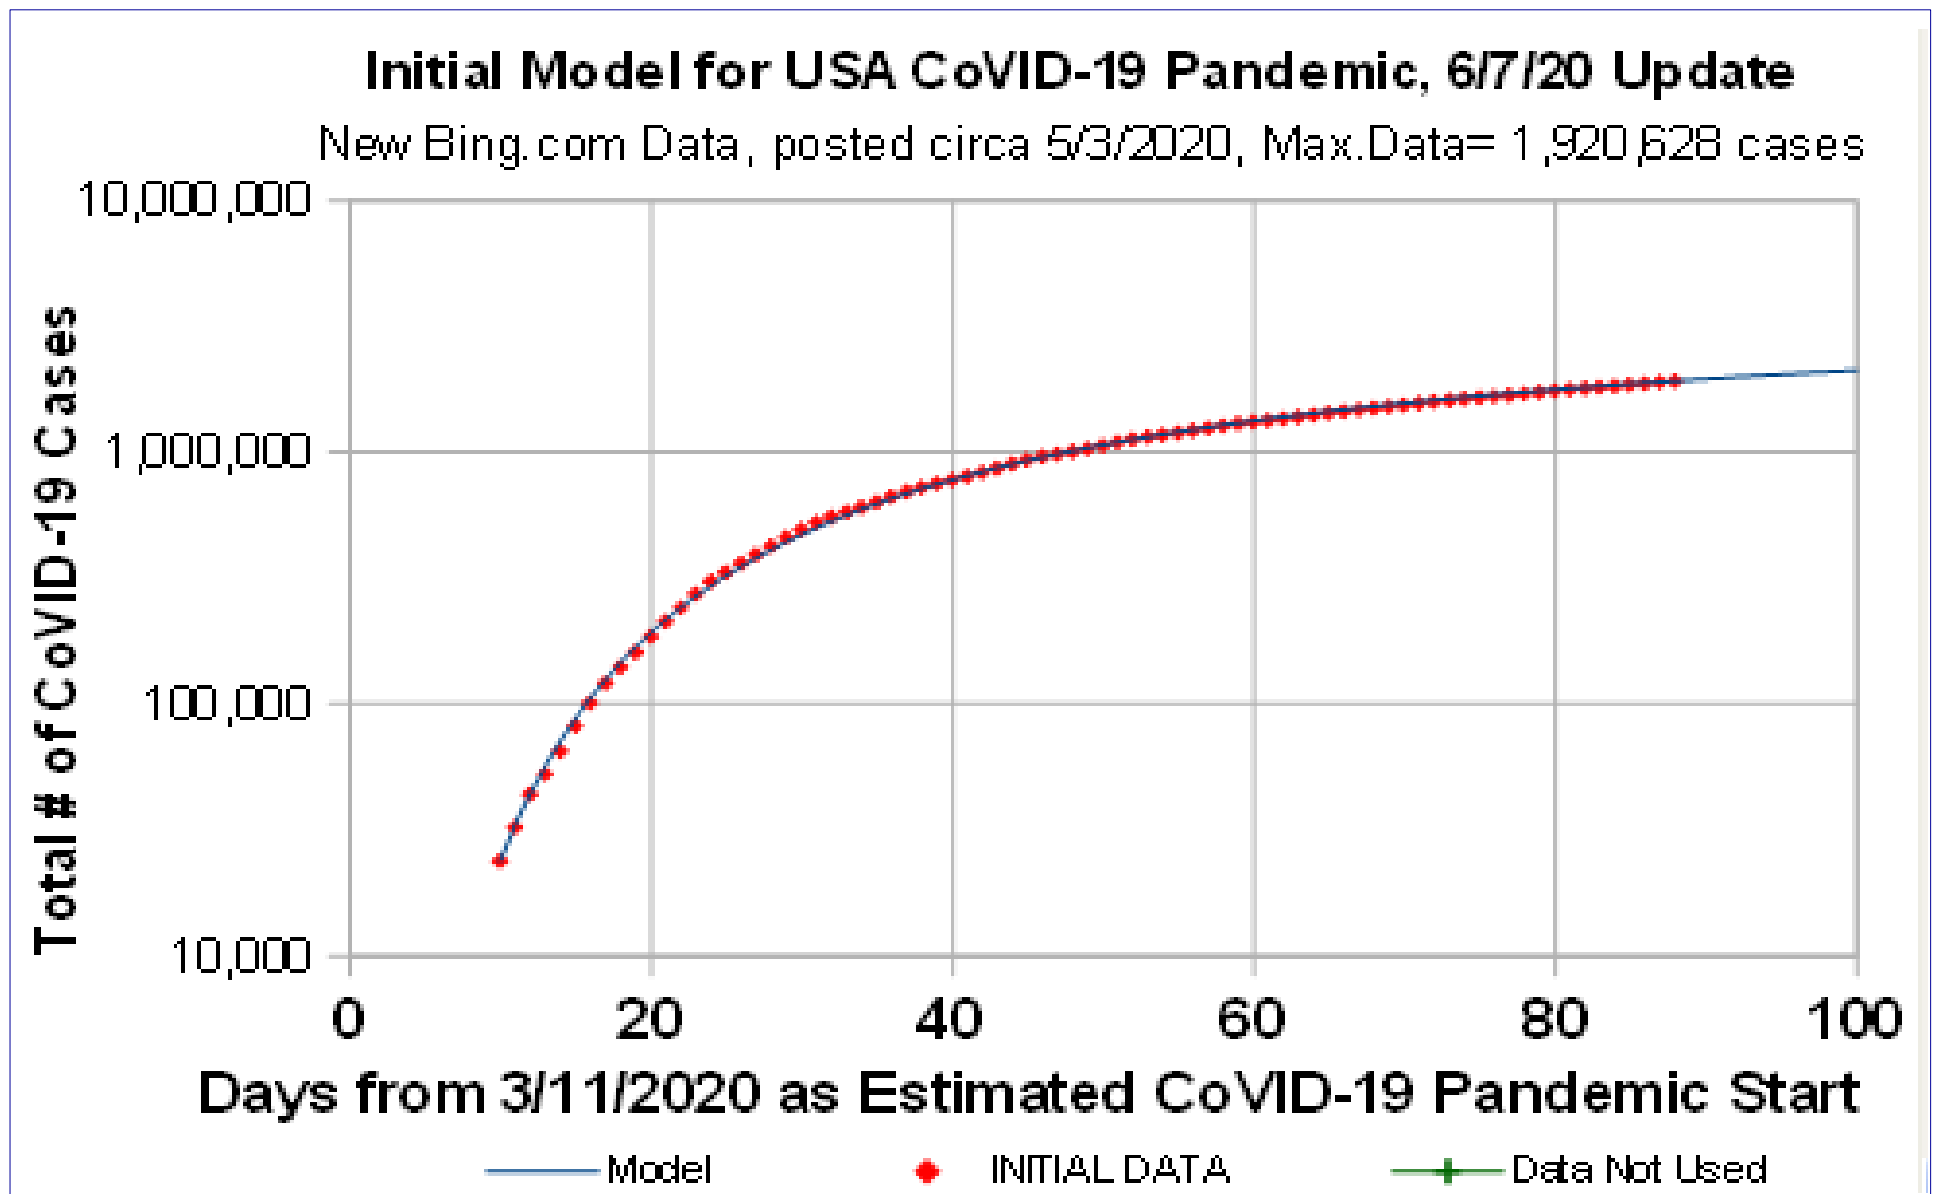

**Figure 7: *Initial Model* for USA CoVID-19 Projections vs data up to 6/7/2020.** Revised *bing.com* data, circa 5/3/2020, changed all values back to the pandemic start. *Initial Model* appears to be a good datafit by itself.

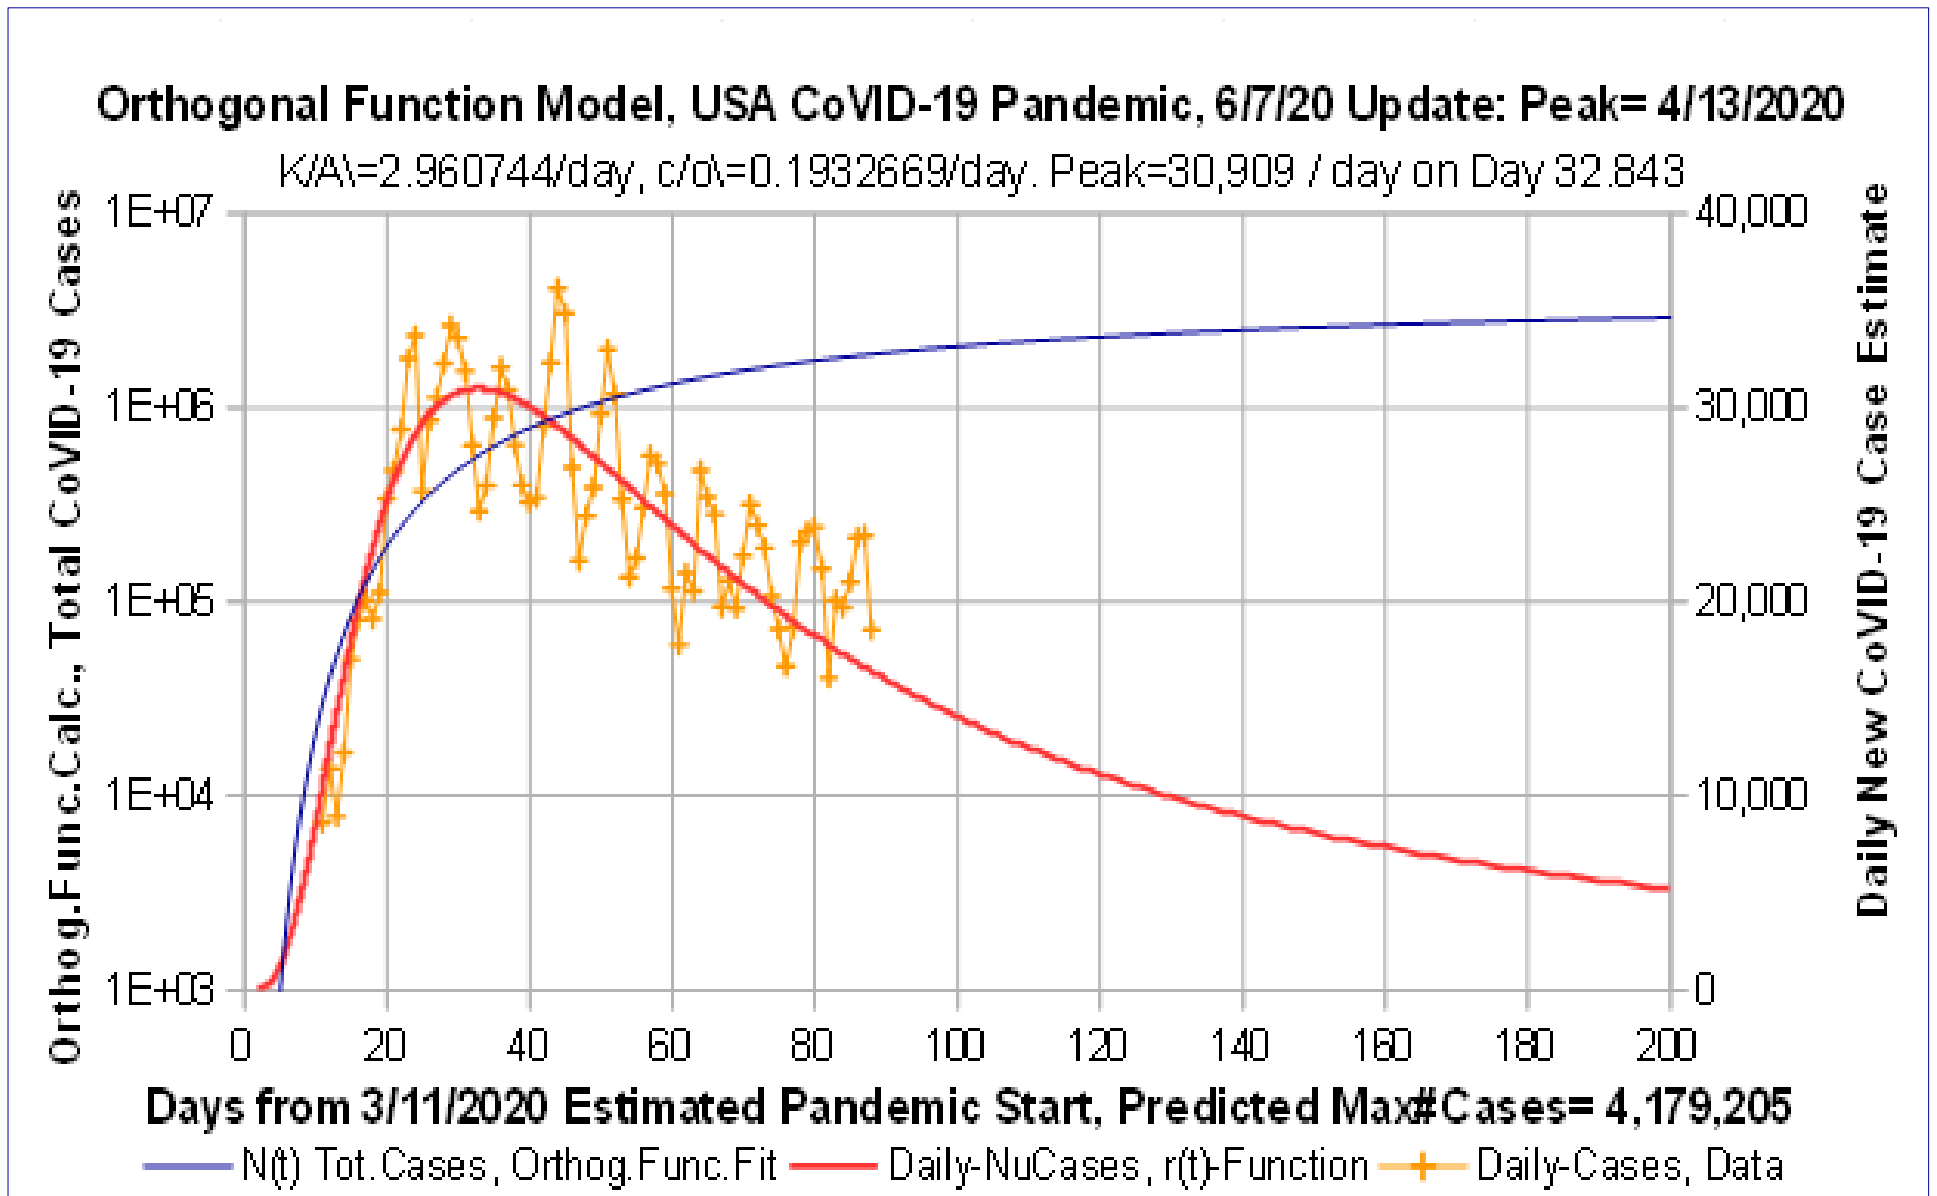

**Figure 8: Orthogonal Function Model, USA CoVID-19 Projections, data to 6/7/2020.** Revised *bing.com* data; daily# of CoVID-19 Cases Peak at 30,909 cases/day on 4/13/2020; with 4,179,205 cases total; and ~5,140 new cases/day at Day 200 on 9/27/2020.

# Orthogonal Function Model, USA CoVID-19 Pandemic, 6/7/2020 Update

Early May 2020 bing.com revision changed all data back to pandemic start

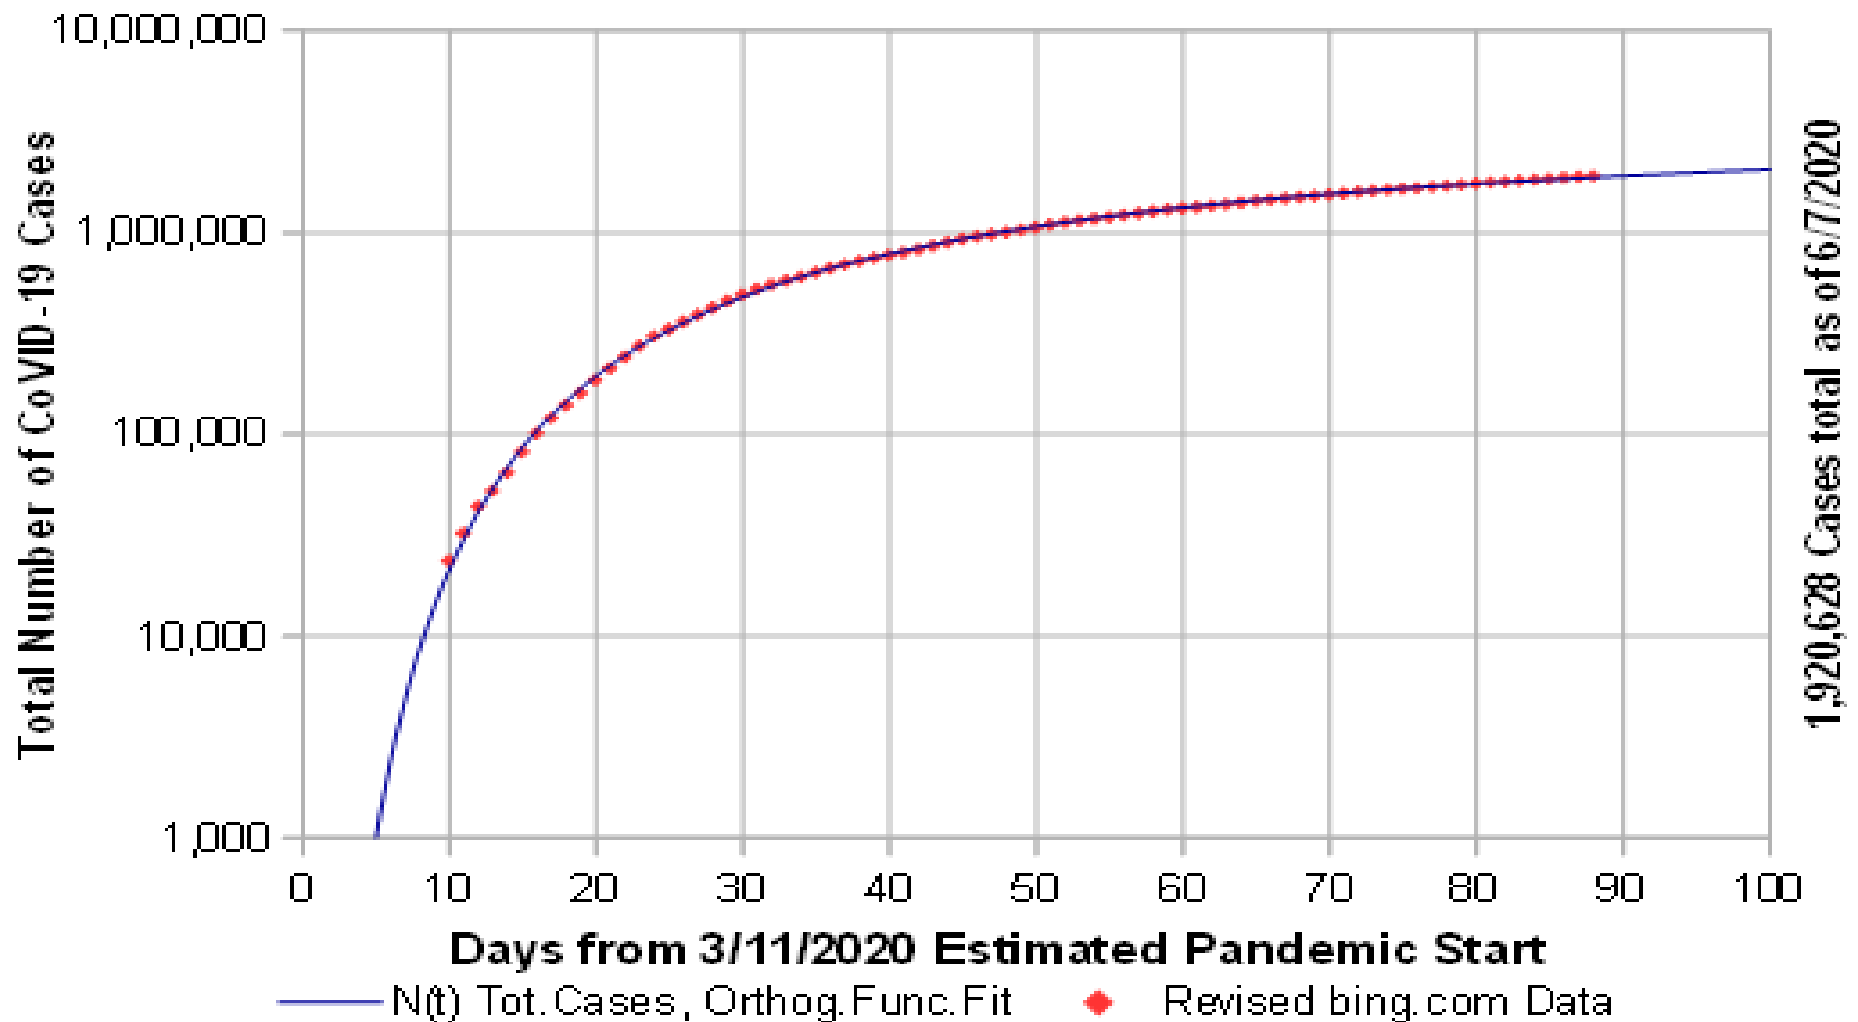

**Figure 9: Orthogonal Function Model, USA CoVID-19 Projections, data to 6/7/2020.** Revised *bing.com* data, posted circa 5/3/2020, changed values back to the pandemic start. *Orthogonal Function Model* matches the data a bit better than the *Initial Model*.

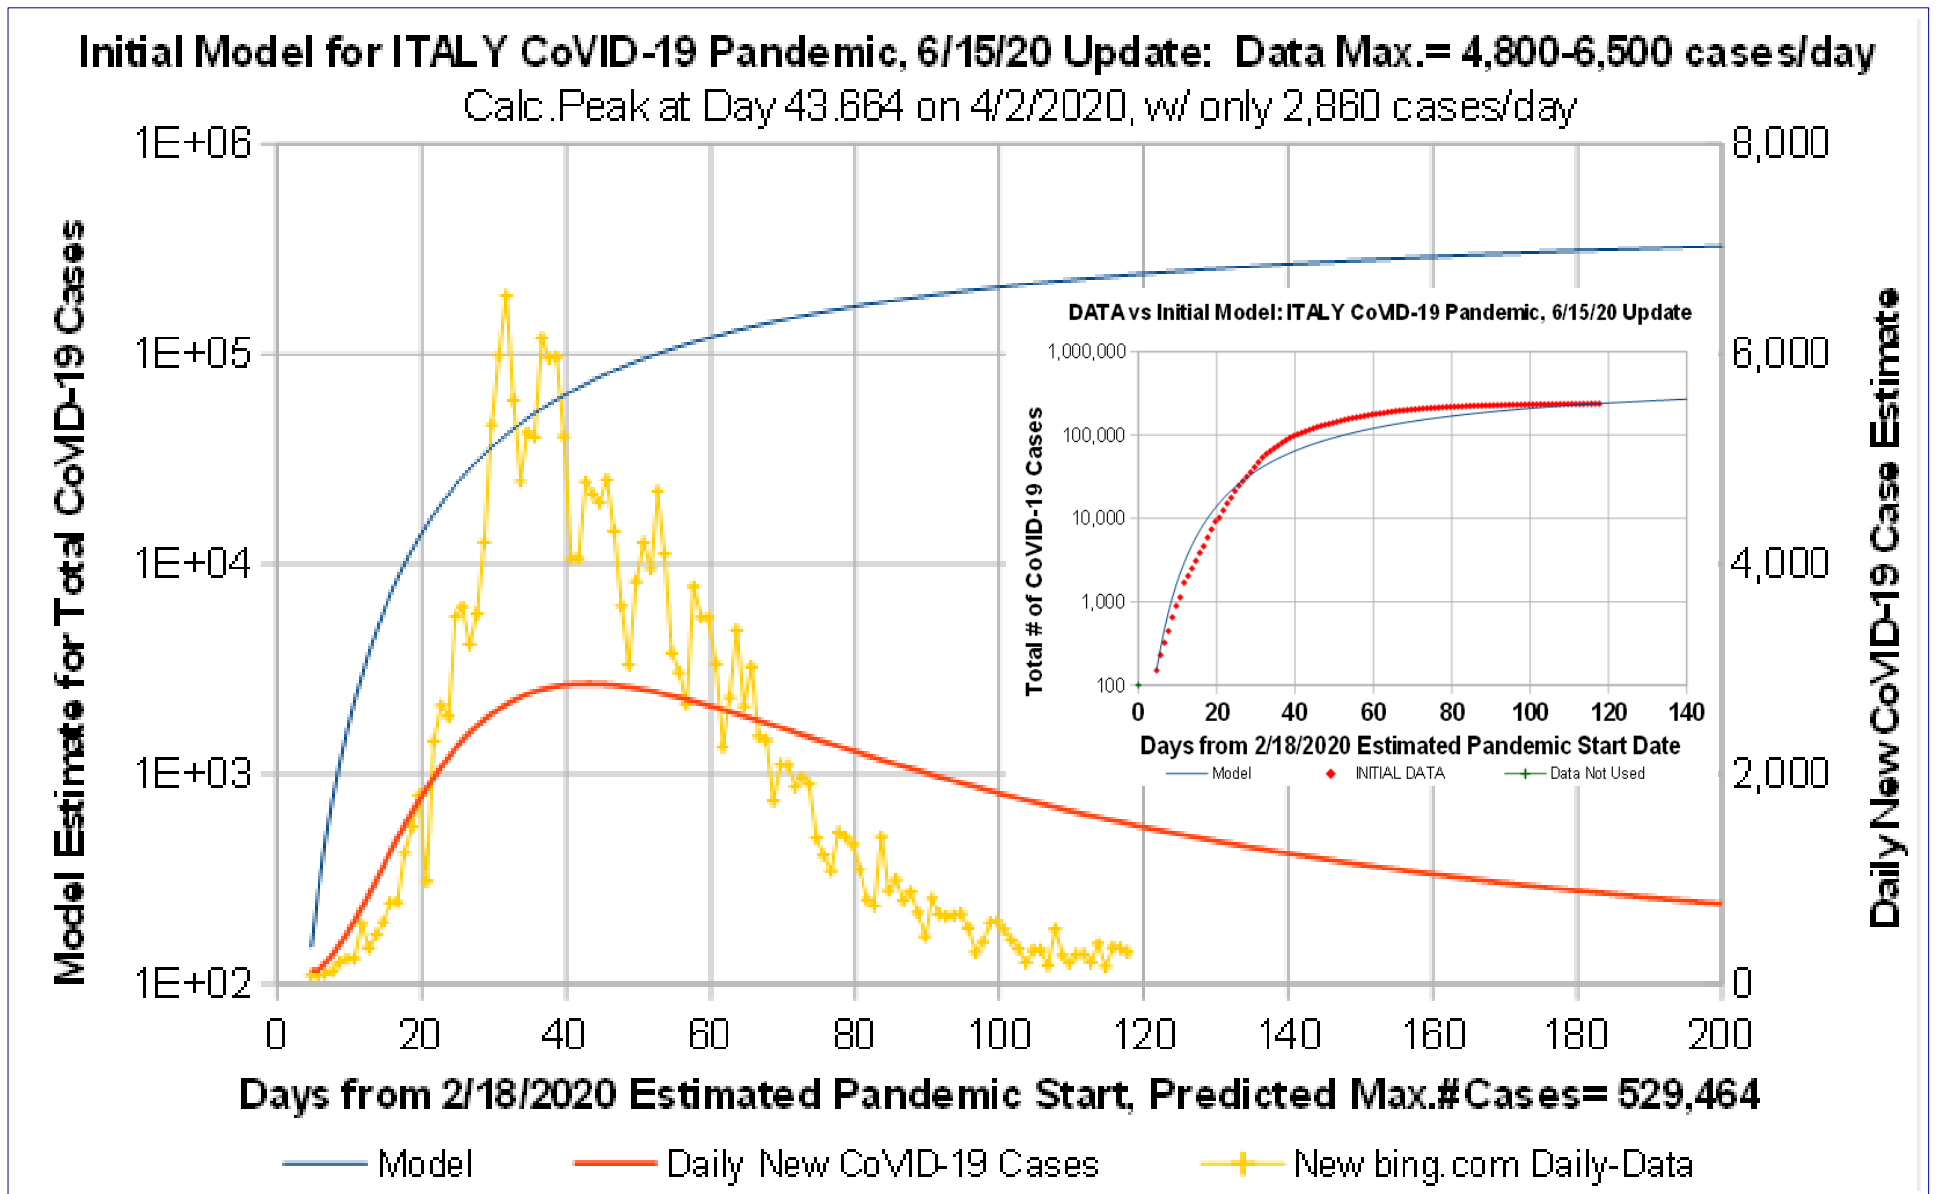

**Figure 10: Initial Model for ITALY CoVID-19 Projections vs data up to 6/15/2020.**  
*Initial Model* matches Total Number of Cases at data start and data end, but best fit using a logarithmic Y-axis does not give a good fit for Predicted Number of Daily CoVID-19 cases.

# Orthogonal Function Model, ITALY CoVID-19 Pandemic, 6/15/20 Update: Peak= 3/29/2020

$K/\lambda=1.7733472/\text{day}$ ,  $\psi/\sigma\lambda=0.1315567/\text{day}$ . Calc. Peak=3,886 / day on Day 40.164

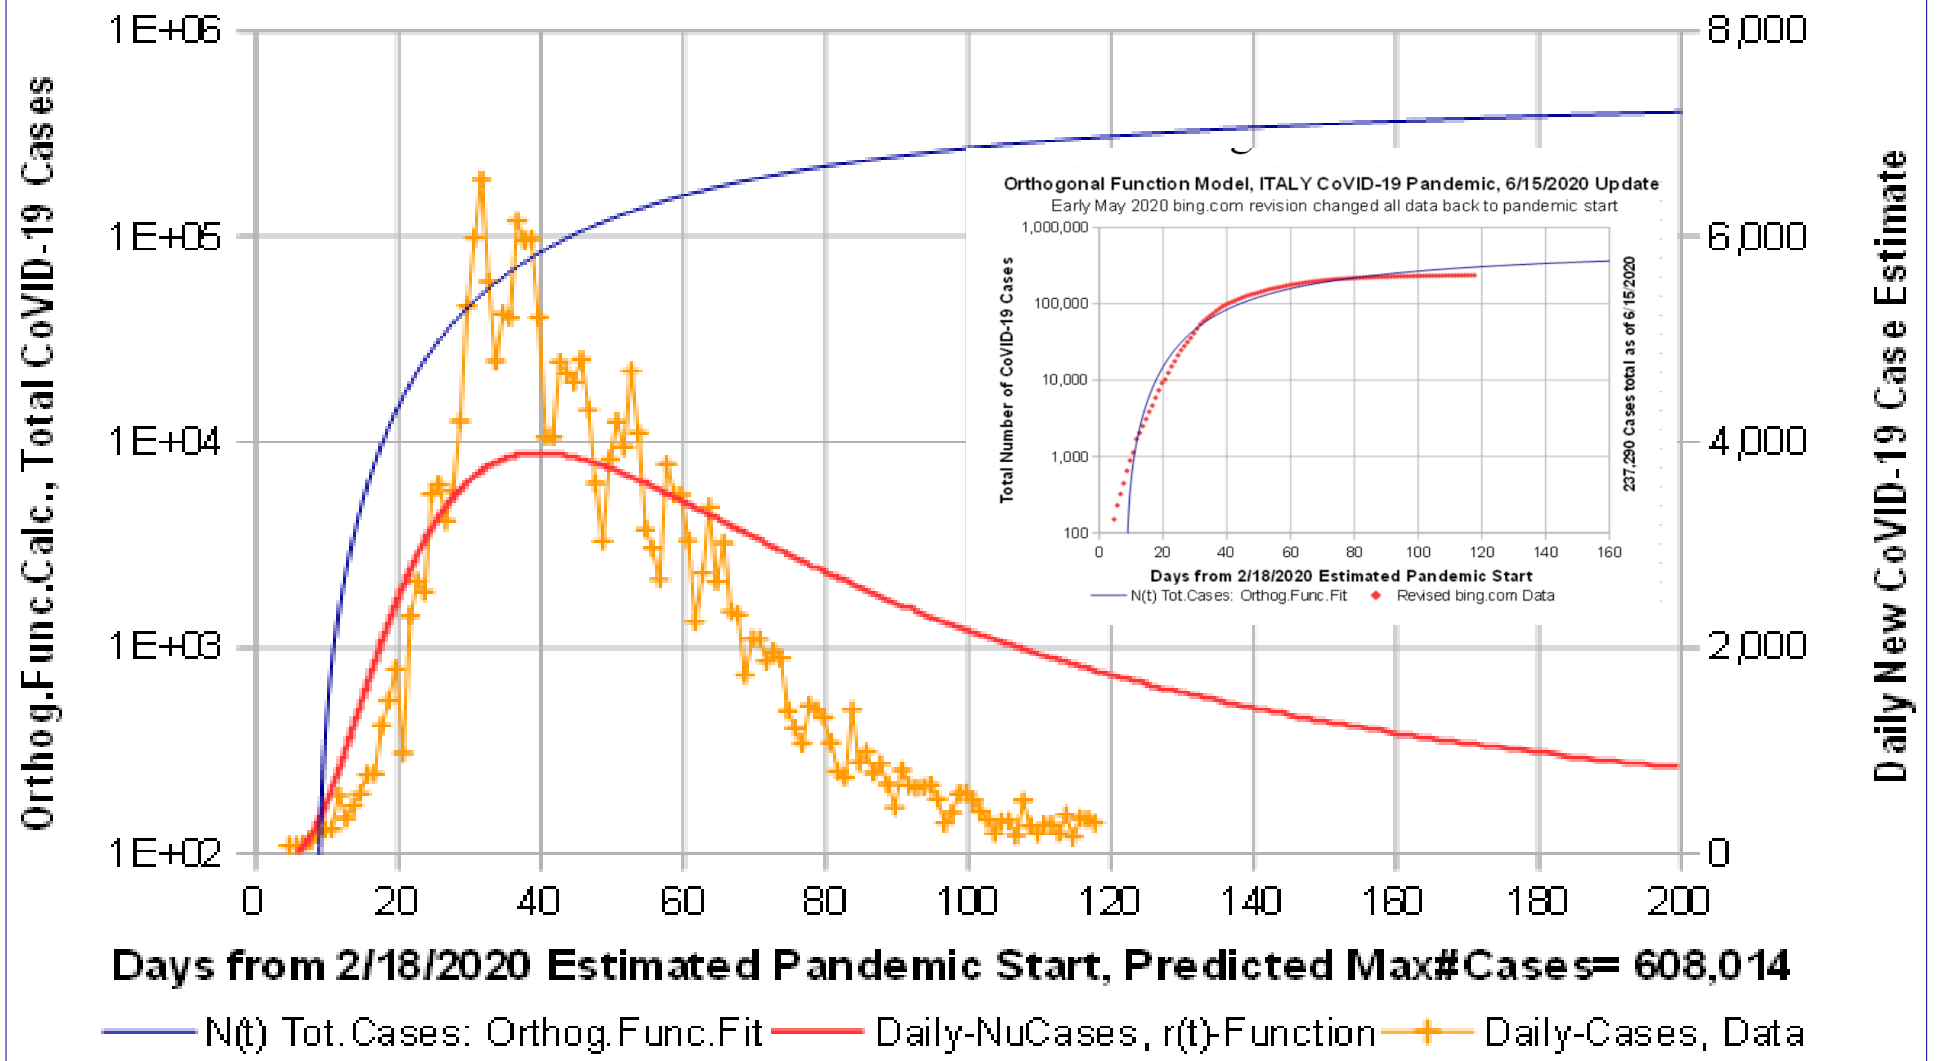

**Figure 11: Orthogonal Function Model for ITALY CoVID-19 data up to 6/15/2020.** Orthogonal Function Model gives improved datafit, but 3-terms in orthogonal function series is insufficient to accurately predict a rapidly decreasing Number of Daily CoVID-19 cases.





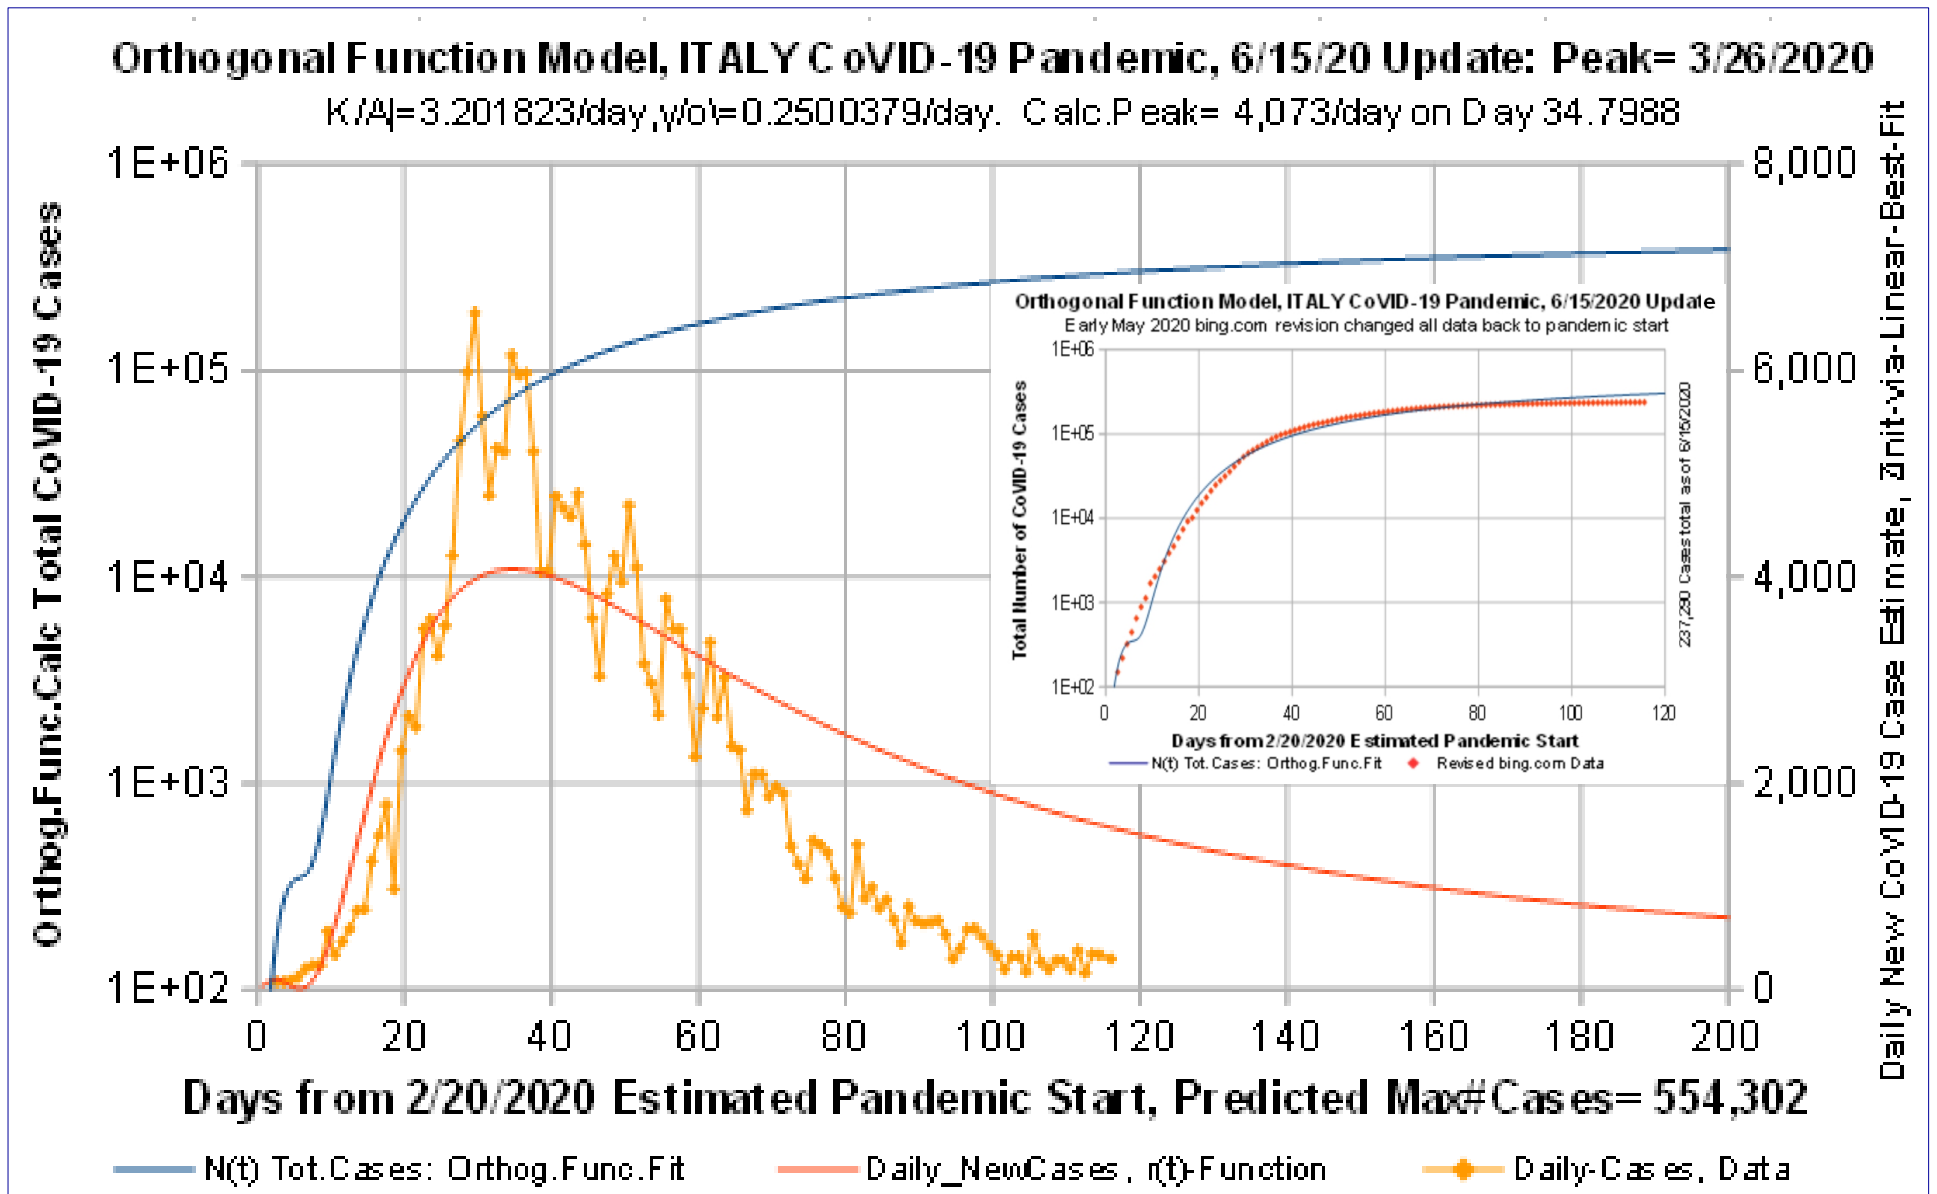

**Figure 13: Orthogonal Function Model re-do, ITALY CoVID-19 data to 6/15/2020.**  
 Orthogonal Function Model re-do using linear Y-axis gives a slightly better small-series fit.  
 Other *Social Distancing* impacts likely exist besides just lengthening pandemic doubling times.
